# Supplementary material for: Interface rich CuO/Al2CuO4 surface for selective ethylene production from electrochemical CO2 conversion
Source: Royal Society of Chemistry journal article supplement (doi:10.1039/d1ee03861c), 2022-01-01
Supplement: d1ee03861c1.pdf [file d1ee03861c1.pdf]

## Supplementary Information

### Interface rich CuO/Al<sub>2</sub>CuO<sub>4</sub> surface for selective ethylene production from electrochemical CO<sub>2</sub> conversion

Siraj Sultan,<sup>†a</sup> HoJeong Lee,<sup>†a</sup> Sojung Park,<sup>†b</sup> Minho M. Kim,<sup>†c</sup> Aram Yoon,<sup>†df</sup> Hansaem Choi,<sup>a</sup> Tae-Hoon Kong,<sup>a</sup> Young-Jin Koe,<sup>e</sup> Hyung-Suk Oh,<sup>e</sup> Zonghoon Lee,<sup>\*df</sup> Hyungjun Kim,<sup>\*c</sup> Wooyul Kim<sup>\*b</sup> and Youngkook Kwon<sup>\*a</sup>

<sup>a</sup> School of Energy and Chemical Engineering, Ulsan National University of Science and Technology (UNIST), Ulsan 44919, Republic of Korea.

<sup>b</sup> Department of Energy Engineering / KENTECH Institute for Environmental and Climate Technology, Korea Institute of Energy Technology.

<sup>c</sup> Department of Chemistry, Korea Advanced Institute of Science and Technology (KAIST), Daejeon 34141, Republic of Korea.

<sup>d</sup> Department of Materials Science and Engineering, UNIST, Ulsan 44919, Republic of Korea.

<sup>e</sup> Clean Energy Research Center, Korea Institute of Science and Technology (KIST), Seoul 02792, Republic of Korea

<sup>f</sup> Center for Multidimensional Carbon Materials, Institute for Basic Science (IBS), UNIST, Ulsan 44919, Republic of Korea

\*Correspondence and requests for materials should be addressed to Y.K. (ykwon@unist.ac.kr), W.K (wkim@kentech.ac.kr), H.K (linus16@kaist.ac.kr) and Z.L (zhlee@unist.ac.kr).

<sup>†</sup> These authors contributed equally to this work.

## Supplementary Methods

**Chemicals:** Copper (II) nitrate trihydrate ( $\text{Cu}(\text{NO}_3)_2 \cdot 3\text{H}_2\text{O}$ , 99.99%), aluminium nitrate nonahydrate ( $\text{Al}(\text{NO}_3)_3 \cdot 9\text{H}_2\text{O}$ , 98%), ammonium carbonate ( $(\text{NH}_4)_2\text{CO}_3$ , 99.99%), Nafion 117 solution (5 wt% in mixture of lower aliphatic alcohols and water, contains 45% water), 2-propanol ( $(\text{CH}_3)_2\text{CHOH}$ , anhydrous 99.5%),  $\text{NH}_4\text{F}$  ( $\geq 98.0\%$ ; ACS Reagent),  $\text{Na}_2\text{SO}_3$  ( $\geq 98.0\%$ ),  $\text{NH}_4\text{Cl}$  (99.998%; trace metals basis),  $\text{Na}_2\text{S}_2\text{O}_3 \cdot 5\text{H}_2\text{O}$  ( $\geq 99.5\%$ ; ACS Reagent),  $\text{NaAuCl}_4 \cdot 2\text{H}_2\text{O}$  (99%),  $\text{KHCO}_3$  ( $\geq 99.95\%$  trace metals basis, 99.7-100.5% dry basis) and  $\text{D}_2\text{O}$  (99.9 atom % D) were purchased from Sigma-Aldrich. Alumina polishing suspensions and alumina pads were purchased from BASi Inc (PK-4 Electrode Polishing Kit). Ultrapure deionized water (DI water, resistivity  $\geq 18.2 \text{ M}\Omega \text{ cm}$ ) was used in all experiments which was prepared using a Human-Power I+ water purification system (Human Corporation).

**Characterization techniques:** TEM, HRTEM, HAADF-STEM images and EDS mapping were taken on JEOL JEM-2100F at an acceleration voltage of 200 kV. Samples for TEM analysis were prepared by dropping the colloidal solution of the catalyst (catalyst powder was thoroughly dispersed in anhydrous ethanol) on a carbon-coated nickel grid (Holey carbon-Ni, 200 mesh, 50 micron) and dried overnight at room temperature. To observe the clear crystal structures of  $\text{CuO}$  and  $\text{Al}_2\text{CuO}_4$  in  $\text{CuO}/\text{Al}_2\text{CuO}_4$ -23, additional HAADF-STEM images, EDS mapping and line-scan analysis were performed using aberration-corrected TEM (FEI Titan3 G2 60-300) at 80 kV. XRD analysis was carried out on a RIGAKU SmartLab in  $2\theta$  range of  $10$ – $90^\circ$  using  $\text{Cu K}\alpha 1$  ( $\lambda = 0.15406 \text{ nm}$ ) radiation source. XPS analysis was measured on K-Alpha (Thermo Fisher, UK) instrument. The weight percent of Cu and Al in the synthesized catalysts ( $\text{CuAl-1}$  to  $\text{CuAl-3}$ ) were obtained with ICP-OES (700-ES, Varian). XAS data for the Cu K-edge were acquired in transmission mode using beamline 6D of Pohang Accelerator Laboratory (PAL). Background subtraction, normalization, and Fourier-transform were done by standard procedure with the ATHENA program. The extracted XANES, (FT) EXAFS and  $k^3\chi(k)$  oscillation signals of Cu metal were analyzed for all four catalysts.

**Ex situ and in situ/operando X-ray absorption analysis:** X-ray absorption fine structure spectroscopy (XAFS) data for the Cu K-edge were acquired in transmission mode using the 6D UNIST beamline located at the Pohang Accelerator Laboratory (PAL). The operando XAFS experiments were performed on the 1D KIST beamline located in PAL. The working electrode was prepared by depositing 0.6 mg of  $\text{CuAl-1}$  catalyst on  $2.5 \times 1.5 \text{ cm}^2$  Toray carbon paper. The working electrode, reference electrode ( $\text{Ag}/\text{AgCl}$ ) and counter electrode (Pt foil) were mounted onto a homemade gas-fed XAFS fluorescence electrochemical cell, adapted for the in-situ experiments. As an electrolyte, we used high purity  $\text{CO}_2$  saturated 0.1 M  $\text{KHCO}_3$  solution and the flow of  $\text{CO}_2$  (flow rate: 5 sccm) was maintained during the operando XAFS-electrochemical  $\text{CO}_2\text{RR}$  experiments. The electrochemical experiments for the operando XAFS analysis was carried out under the chronoamperometric conditions, where the electrode was biased at different applied potentials from the open-circuit voltage (OCV) down to  $-1.05 \text{ V}$ , same with the  $\text{CO}_2\text{RR}$  activity measurement condition. The EXAFS spectrum at each potential took about 20 min. The applied potential was controlled through the VSP-modular potentiostat. Background subtraction, normalization, and Fourier-transform were done by standard procedure with the ATHENA program. The extracted XANES, (FT) EXAFS and  $k^3\chi(k)$  oscillation signals of Cu metal were analyzed for all four catalysts.

**Flow-cell measurements:** For the flow-cell experiment, the electrode for the cathode was prepared by spraying 20 mL of well-mixed catalyst ink containing 50 mg of catalyst, 313  $\mu\text{L}$  of Nafion and 19.687 mL of ethanol onto a  $4 \text{ cm}^2$  carbon gas-

diffusion electrode (GDE, Sigracet, Fuel Cell Store). The total catalyst load on the GDE was  $0.6 \text{ mg cm}^{-2}$  (the GDE after spraying and drying with ink was weighed for the total amount of catalyst on its surface). The GDE with catalyst and Hg/HgO (1 M NaOH) was used as working and reference electrodes in the cathode chamber and the Ni-Fe-Mo foil as a counter electrode in the anode chamber. The cathode and anode chambers were separated by an anion-exchange membrane (AEM, Fumapem FAA-3-PK-130). The cathode area exposed to electrolyte and  $\text{CO}_2$  gas was  $1 \text{ cm}^2$ , while the anode area was  $2.0 \times 2.0 \text{ cm}^2$ . 1.0 M aqueous KOH solution was used as both catholyte and anolyte. During electrochemical measurements, the electrolyte was circulated into the cathode and anode chambers at a flow rate of  $6.0 \text{ mL min}^{-1}$  and the  $\text{CO}_2$  gas with a flow rate of 20.0 sccm was fed directly into the cathode gas compartment. Note: In a flow-cell electrolyzer, the strong  $\text{CO}_2$  capturing ability of the KOH solution and the high conversion rate of  $\text{CO}_2$  into gas/liquid products due to high current densities can significantly change the gas outlet flow rate from the reactor to gas chromatography (GC), therefore, the faradaic efficiency (FE) of the gas products can be calculated on the outlet gas flow rate but not the inlet gas flow rate.<sup>1</sup> Thus, to obtain reliable and accurate FE for each gas product, we carefully monitored the outlet gas flow rate from the flow-cell reactor to the GC by a flow meter and use it for the FE calculations. The electrochemical  $\text{CO}_2\text{RR}$  activity in the Flow-cell system was measured by the chronopotentiometry measurements method in the current densities ranges of 100-1000  $\text{mA cm}^{-2}$ .

### Electrode preparation for Attenuated total reflection-surface enhanced infrared absorption spectroscopy (ATR-SEIRAS) measurement:

The catalysts (CuO and CuAl-1) ink was prepared by dispersing 1 mg of catalyst powder with 6  $\mu\text{L}$  Nafion solution in 0.6 mL of isopropyl alcohol by ultrasonication. To prepare the electrode, 0.5 mL of ink was sprayed onto the Au coated Si prism electrode with  $0.5 \text{ cm}^2$  of an active area using a spray gun. The electrode was dried in air for the subsequent electrochemical tests. Au thin films were prepared by an electroless plating procedure.<sup>2</sup> The reflective plane of a  $60^\circ$  Si prism (Veemax, 2 cm in diameter) was sequentially polished with alumina pastes for 10-15 min each to obtain a fresh Si layer. The crystal was then rinsed in a constant stream of DI water for 5-10 min while wiping it with a wet Kim-wipe. Sequentially, the Si surface was etched by immersing the reflective plane of the prism in an aqueous solution of 40 wt. %  $\text{NH}_4\text{F}$  (25  $^\circ\text{C}$ ) for 1 min. After etching, the prism was rinsed with DI water and the reflective surface was immersed in the mixture of the Au plating solution ( $0.015 \text{ M NaAuCl}_4 \cdot 2\text{H}_2\text{O} + 0.15 \text{ M Na}_2\text{SO}_3 + 0.05 \text{ M Na}_2\text{S}_2\text{O}_3 \cdot 5\text{H}_2\text{O} + 0.05 \text{ M NH}_4\text{Cl}$  and a 2 wt% hydrofluoric acid solution in a 1:2 volume ratio;  $T = 60^\circ\text{C}$ ) for 2 min, rinsed with DI water and dried. The CuO and CuAl-1 catalysts were prepared on the Au coated Si prism according to the aforementioned procedure.

**In-situ ATR-SEIRAS measurements:** The working electrode prepared on Si prism was placed in a two-compartment with a three-electrode Spectro-electrochemical cell. The working electrode (CuO or CuAl-1), and the reference electrode (Ag/AgCl: Basi, 3 M NaCl) were separated from the platinum wire (counter electrode) by a selemion AMV anion exchange membrane. The only stirring effect inside the cell was from various bubbled gases. The cell was integrated into the Fourier Transform Infrared Spectrophotometer (VERTEX 80v, Bruker) equipped with a mercury cadmium telluride (MCT) detector and a variable angle specular reflectance accessory (VeemaxIII, Pike technologies). The electrochemical measurements for the ATR-SEIRAS were performed on Autolab PGSTAT204 potentiostat. The electrochemical measurements were carried out in 0.1 M  $\text{KHCO}_3$   $\text{D}_2\text{O}$  electrolyte at room temperature and the electrode catalysts before the measurements were activated by cyclic

voltammetry from -0.55 to -2.2 V (vs. Ag/AgCl) at a scan rate of 0.02 V s<sup>-1</sup> in CO<sub>2</sub> saturated electrolyte for a total of three cycles. Before activation, the constant flow of CO<sub>2</sub> gas (19-20 sccm, adjusted by a mass flow controller: MC-100SCCM-D; Alicat Scientific) was purged into the electrolyte for 1 h to form a CO<sub>2</sub> saturated solution and maintain the CO<sub>2</sub> flow throughout the electrochemical experiments. All spectroscopic measurements were conducted with a spectral resolution of 4 cm<sup>-1</sup>. The spectra were presented in absorbance, with positive and negative peaks showing an increase and decrease in the signal, respectively.

In-situ ATR-SEIRAS measurements during the chronoamperometric scan were carried out with a time resolution of ~60 s. The cathodic chronoamperometric scan was conducted from -0.5 to -2.2 V (vs. Ag/AgCl) with 0.1 V intervals. Each potential was maintained for 2 min and the corresponding IR spectra for each potential were collected simultaneously with the time of applying potential.

Time-resolved IR measurements at a fixed potential were performed with a time resolution of ~3 s. A target potential was applied for 2 min. Spectra acquisition was initiated 60 seconds before applying the desired potential. The spectrum collected at -0.9 V (vs. Ag/AgCl) was used as the baseline.

**Faradaic efficiency:** Faradaic efficiency (FE) for the CO<sub>2</sub>RR products in H-Cell were calculated according to the following equations and procedures. For our FE calculation, we take the example of C<sub>2</sub>H<sub>4</sub>.

$$FE_{C_2H_4} = \frac{z \cdot \dot{n}_{C_2H_4} \cdot F}{Q/t} \quad (1)$$

In equation 1,  $z$  is the transfer of electrons [for C<sub>2</sub>H<sub>4</sub> the  $z$  value is 12  $\frac{mol e^-}{mol C_2H_4}$  according to the equation;  $2CO_2 + 12H^+ + 12e^- \rightarrow C_2H_4 + 4H_2O$ ],  $\dot{n}_{C_2H_4}$  is the number of mol of C<sub>2</sub>H<sub>4</sub> produced per second, which is calculated according to equation 2.  $F$  is the Faraday constant (96,485 C mol<sup>-1</sup>), and  $Q$  is the charge in coulomb, which was  $-3.215 \times 10^{-3}$  A.

$$\dot{n}_{C_2H_4} = \frac{P \times v_{C_2H_4}}{R \times T} \quad (2)$$

In equation 2,  $P$  is pressure in the atmosphere (1 atm),  $v_{C_2H_4}$  is the volumetric flow rate of C<sub>2</sub>H<sub>4</sub> in L/S,  $R$  is the gas constant [ $R = 0.082$  L. atm/K. mol] and  $T$  is the temperature based on our laboratory condition (293 K).

The volumetric flow rate of C<sub>2</sub>H<sub>4</sub> was evaluated from the GC flame ionization detector data and the GC calibration data (Fig. S20, ESI) according to equations 3 to 5. In the raw GC flame ionization detector data, the peaks at 2.397, 4.232, 6.245, 10.068 retention times correspond to CO, CH<sub>4</sub>, unreacted CO<sub>2</sub>, and C<sub>2</sub>H<sub>4</sub>, respectively (Note: the peak at 11.388 retention time corresponds to C<sub>2</sub>H<sub>6</sub>, which was an impurity in the reactant CO<sub>2</sub> gas, which was confirmed by GC).

The portion of the C<sub>2</sub>H<sub>4</sub> in the outlet gas was calculated from equation 4, which used the relationship between ppm and peak area of C<sub>2</sub>H<sub>4</sub> from the GC calibration data in equation 3.

$$\frac{ppm_{C_2H_4}}{Peak\ area_{C_2H_4}} = 4.48535 \times 10^{-5} \quad (3)$$

$$portion_{C_2H_4} = Peak\ area_{C_2H_4} \times 4.48535 \times 10^{-5} \text{ ppm} \quad (4)$$

Thus, the portion of C<sub>2</sub>H<sub>4</sub> in the outlet gas was:

$$portion_{C_2H_4} = 17,511,208 \times 4.48535 \times 10^{-5} \text{ ppm}$$

$$portion_{C_2H_4} = 785.439 \text{ ppm}$$

$$portion_{C_2H_4} = 0.0785439 \%$$

The volumetric flow rate of C<sub>2</sub>H<sub>4</sub> was calculated according to equation 5.

$$v_{C_2H_4} = v_{total} \times portion_{C_2H_4} \quad (5)$$

In equation 5,  $v_{total}$  is the volumetric flow rate of the outlet gas ( $4.2 \text{ ml min}^{-1}$ ).

$$v_{C_2H_4} = 4.2 \frac{\text{mL}}{\text{min}} \times 0.0785439 \%$$

$$v_{C_2H_4} = 3.29884 \times 10^{-3} \frac{\text{mL}}{\text{min}}$$

$$v_{C_2H_4} = 5.49807 \times 10^{-8}$$

Thus, the number of mol of  $C_2H_4$  produced per second according to equation 2 is:

$$\dot{n}_{C_2H_4} = \frac{1 \text{ atm} \times 5.49807 \times 10^{-8} \frac{\text{L}}{\text{s}}}{0.082 \frac{\text{L atm}}{\text{K mol}} \times 293 \text{ K}} = 2.28838 \times 10^{-9} \frac{\text{mol}_{C_2H_4}}{\text{s}}$$

Finally, the FE of  $C_2H_4$  according to equation 1 is:

$$FE_{C_2H_4} = \frac{12 \frac{\text{mol}_{e^-}}{\text{mol}_{C_2H_4}} \times 2.28838 \times 10^{-9} \times 96485 \frac{\text{C}}{\text{mol}_{e^-}}}{3.215 \times 10^{-3} \frac{\text{C}}{\text{s}}} \times 100[\%] = 82.4 \%$$

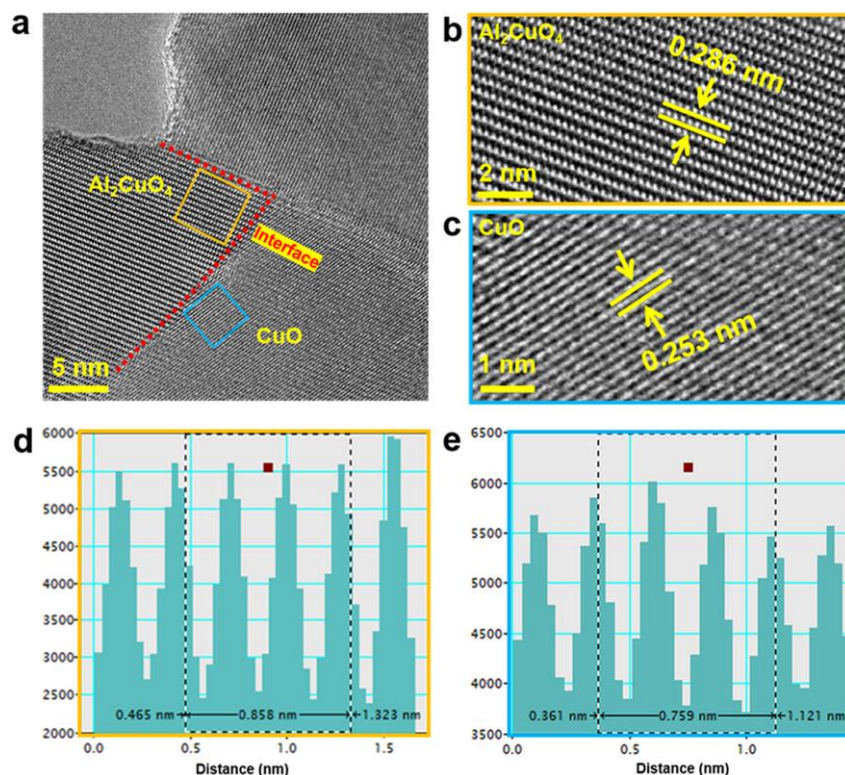

**Fig. S1.** (a) HR-TEM image of the CuO/Al<sub>2</sub>CuO<sub>4</sub> interface in CuAl-1. The red dash line marks the interface region between CuO and Al<sub>2</sub>CuO<sub>4</sub>. (b, d) Magnified HR-TEM image and line intensity profile which is taken from the orange square of Fig. (a). The line intensity profile image in Fig. (d) shows d-spacing values of 0.286 nm, corresponding to the [220] plane of cubic Al<sub>2</sub>CuO<sub>4</sub> crystal. (c, e) Magnified HR-TEM image and line intensity profile which is taken from the blue square of Fig. (a). The line intensity profile image in Fig. (e) shows d-spacing values of 0.253 nm, corresponding to the [111] plane of monoclinic CuO crystal.

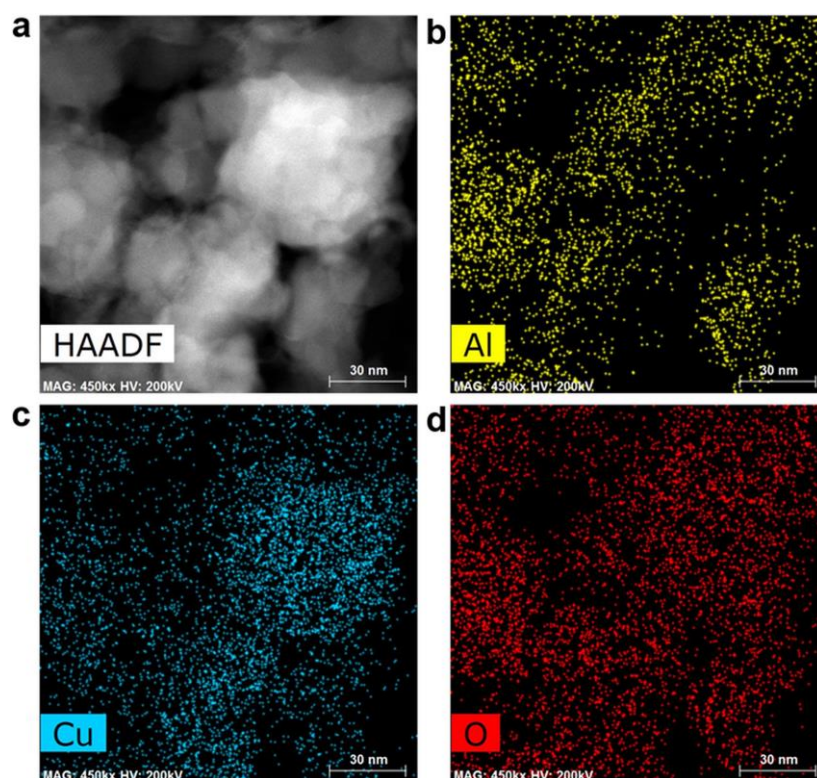

**Fig. S2.** (a) HAADF-STEM image (used for the atomically resolved high angular annular dark field-scanning transmission electron microscopy-high angle annular dark field (HAADF-STEM) analysis) and (b-d) their corresponding EDS maps of Cu, Al and O. The element maps suggest two types of morphology in CuAl-1; a mixture of Cu, Al and O in the nanosheet and Cu and O in the nanoparticles.

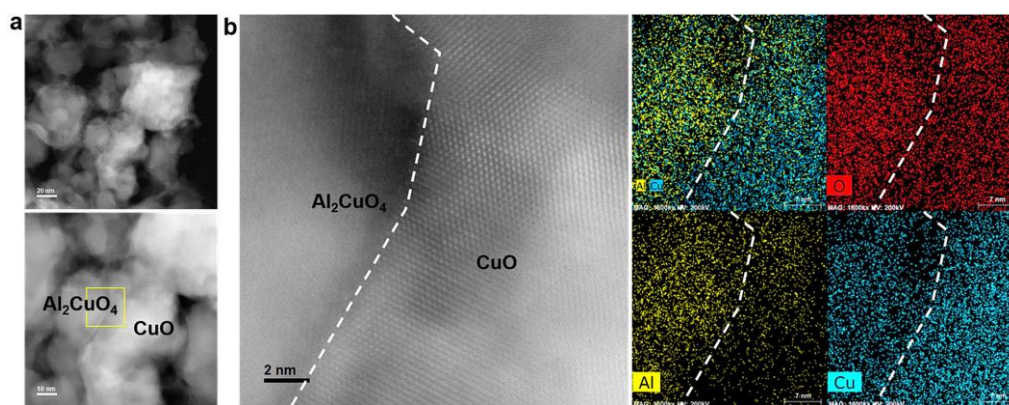

**Fig. S3.** (a) Low-magnification of HAADF-STEM image (b) The atomic resolution STEM image of the of CuO/ $\text{Al}_2\text{CuO}_4$  interface (left) and the corresponding overlay map of Cu/Al as well as individual element maps of Cu, Al and O (right) taken from the orange square of Fig. a (bottom). The white dash line in STEM image of fig. b (left) and element maps (right) clearly show the interface structure between CuO and  $\text{Al}_2\text{CuO}_4$ .



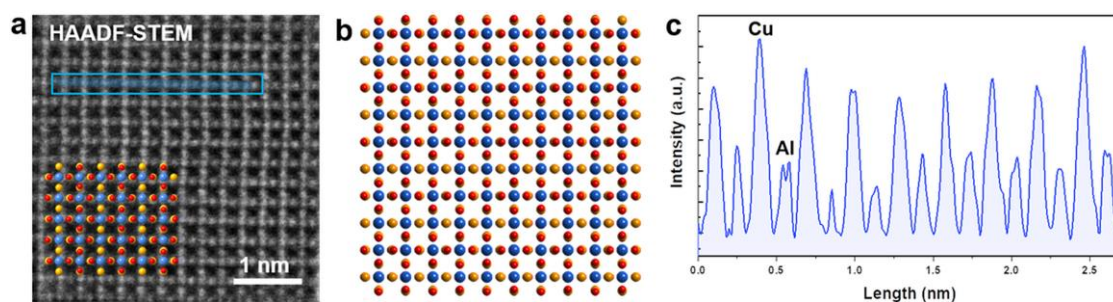

**Fig. S4.** (a) HAADF-STEM image of  $\text{Al}_2\text{CuO}_4$  crystal in CuAl-1 viewed along [100] zone direction. The inset structure on the lattice sites are the ball and stick models for the  $\text{Al}_2\text{CuO}_4$  crystal. (b) Simulated structure model of spinel-type cubic  $\text{Al}_2\text{CuO}_4$  crystal.<sup>3</sup> The blue, yellow and red balls in the inset and simulated structure models refer, respectively to the atoms of Cu, Al and O. (c) The line intensity profile taken from the atomic column which is marked with a blue line in Fig. (a). The line intensity profile conforms distribution of both Cu and Al elements in each atomic column.

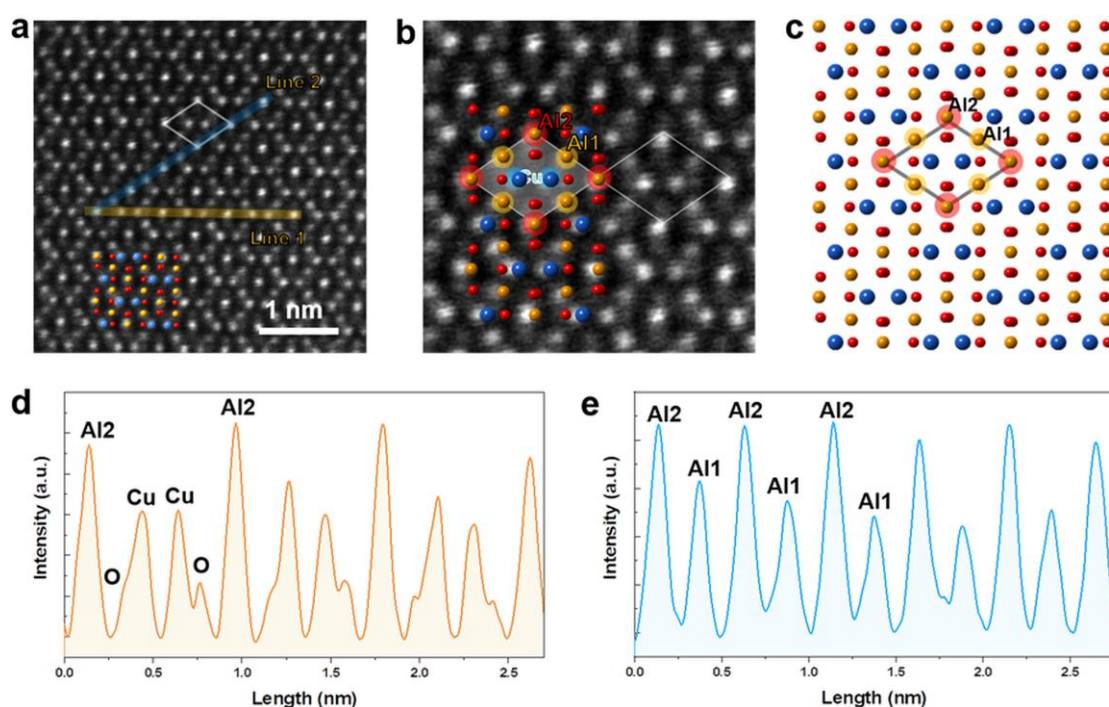

**Fig. S5.** (a) HAADF-STEM image of  $\text{Al}_2\text{CuO}_4$  crystal structure in CuAl-1 viewed along [110] zone direction. (b) Magnified HAADF-STEM image of  $\text{Al}_2\text{CuO}_4$  taken from Fig. (a). (c) The atomic arrangement of the  $\text{Al}_2\text{CuO}_4$  coincides with (c) the atomic model of  $\text{Al}_2\text{CuO}_4$  crystal along with the [110] orientation. In the structure models of  $\text{Al}_2\text{CuO}_4$  (Fig. c and the inset of Fig. b), we mark the Al on the base of its position in the crystal as Al1 and Al2. (d) The line intensity profile is taken from the atomic column marked with an orange line in Fig. a. (e) The line intensity profile taken from the atomic column marked with a blue line in Fig. S5 (a). The figure denotes that the Al2 has larger aluminum content in the atomic column than Al1. These results are consistent with the previous references,<sup>3</sup> and support that the  $\text{Al}_2\text{CuO}_4$  in CuAl-1 has a well-crystallized structure without defects. The blue, yellow and red balls in the inset and structure models refer, respectively to the atoms of Cu, Al and O.



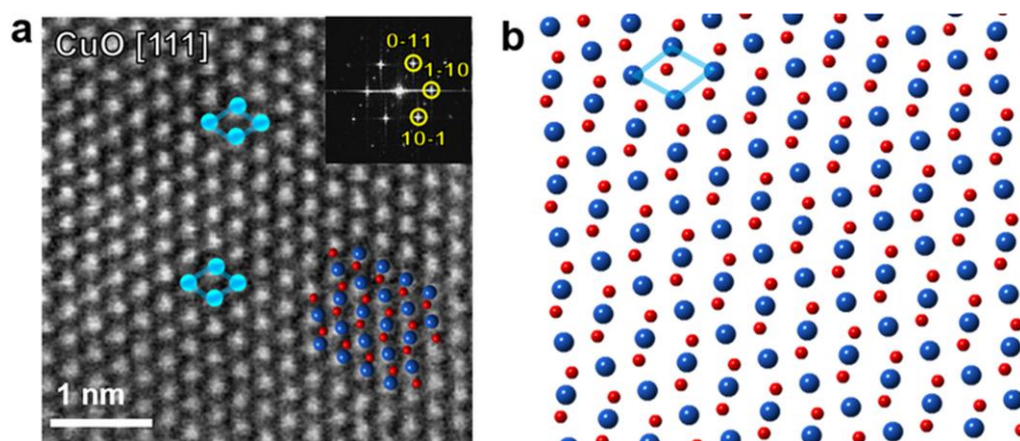

**Fig. S6.** (a) HAADF-STEM image of CuO crystal in CuAl-1 viewed along [111] zone direction. The inset structure on the lattice sites are the ball and stick models for the monoclinic CuO crystal. (b) Crystal structure of monoclinic CuO crystal structure. The blue and red balls in the inset and structure models refer, respectively to the atoms of Cu and O.

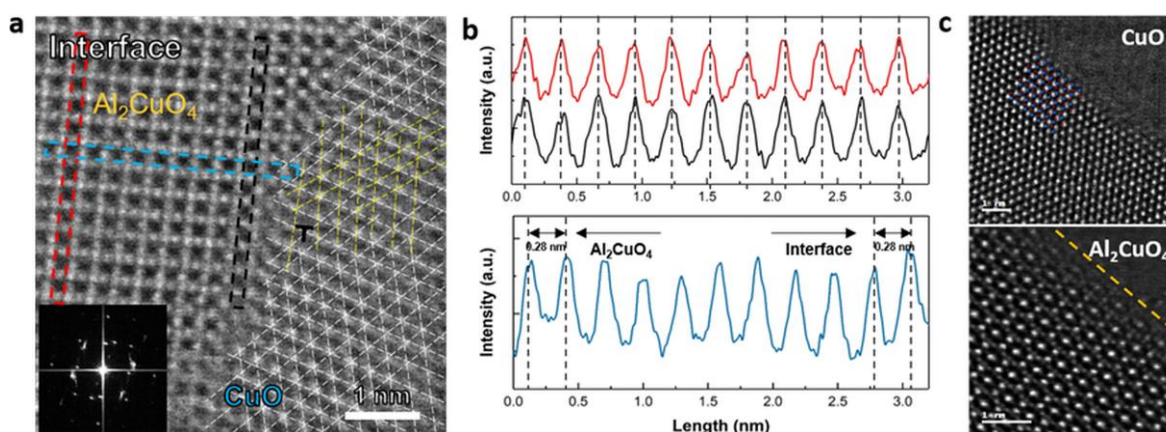

**Fig. S7.** (a) Atomic-resolution HAADF-STEM image at an interface of CuO and Al<sub>2</sub>CuO<sub>4</sub> in CuAl-1. Local lattice distortion of CuO phase induced by adjacent interfacial defects is marked as yellow lines. (b) Line intensity profile for measuring lattice spacing of Al<sub>2</sub>CuO<sub>4</sub>. Each plot is measured from the marked regions in (a), and it shows that tensile or compressive strain does not exist in the CuO/Al<sub>2</sub>CuO<sub>4</sub> interface. (c) HAADF-STEM images of CuO and Al<sub>2</sub>CuO<sub>4</sub> do not show any surface reconstruction at the edges.

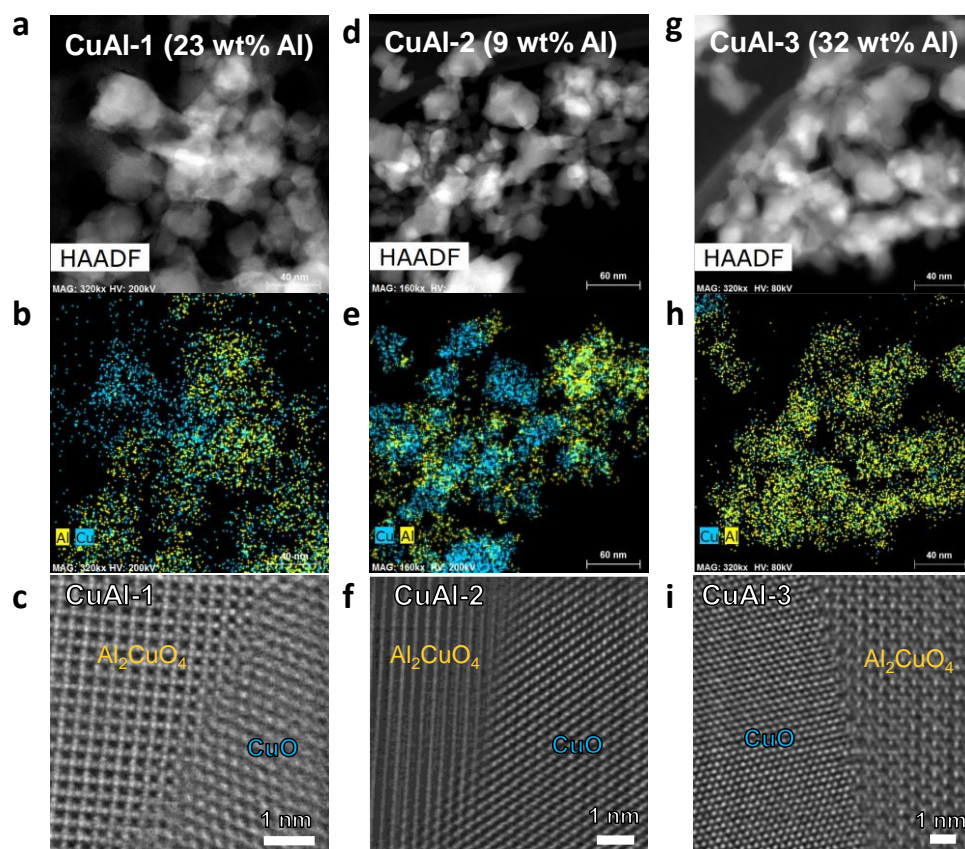

**Fig. S8.** HAADF-STEM images and their corresponding EDS mapping and atomic-resolution STEM images of CuAl-1, CuAl-2, CuAl-3. (a-c) CuAl-1 (d-f) CuAl-2 (g-i) CuAl-3.

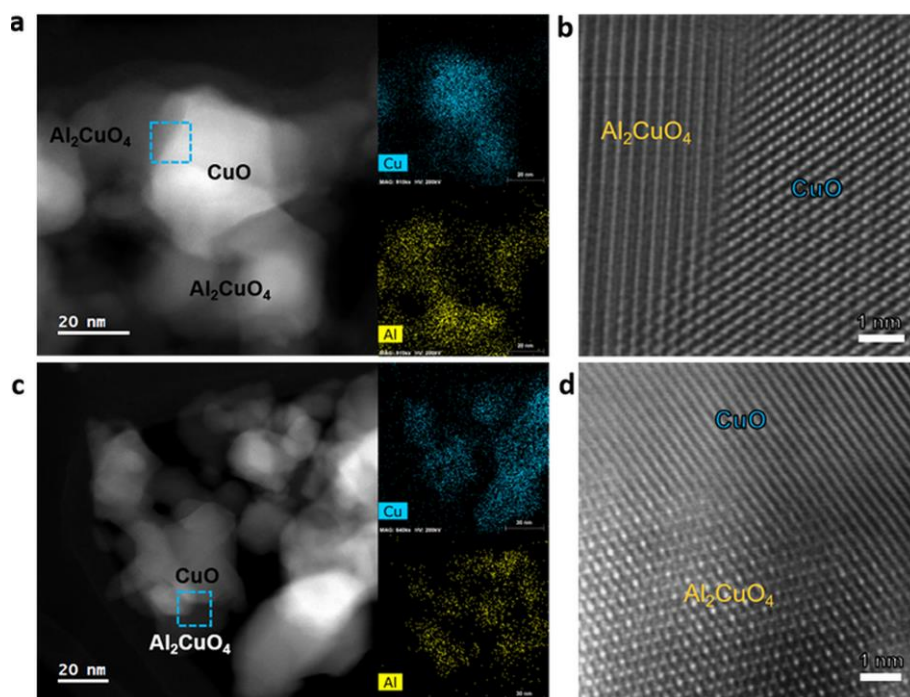

**Fig. S9.** (a, c) HAADF-STEM images and their corresponding individual element maps of Cu and Al in CuAl-2. (b, d) HAADF-STEM images at the CuO/Al<sub>2</sub>CuO<sub>4</sub> interface, taken from the region marked in (a, c), respectively.



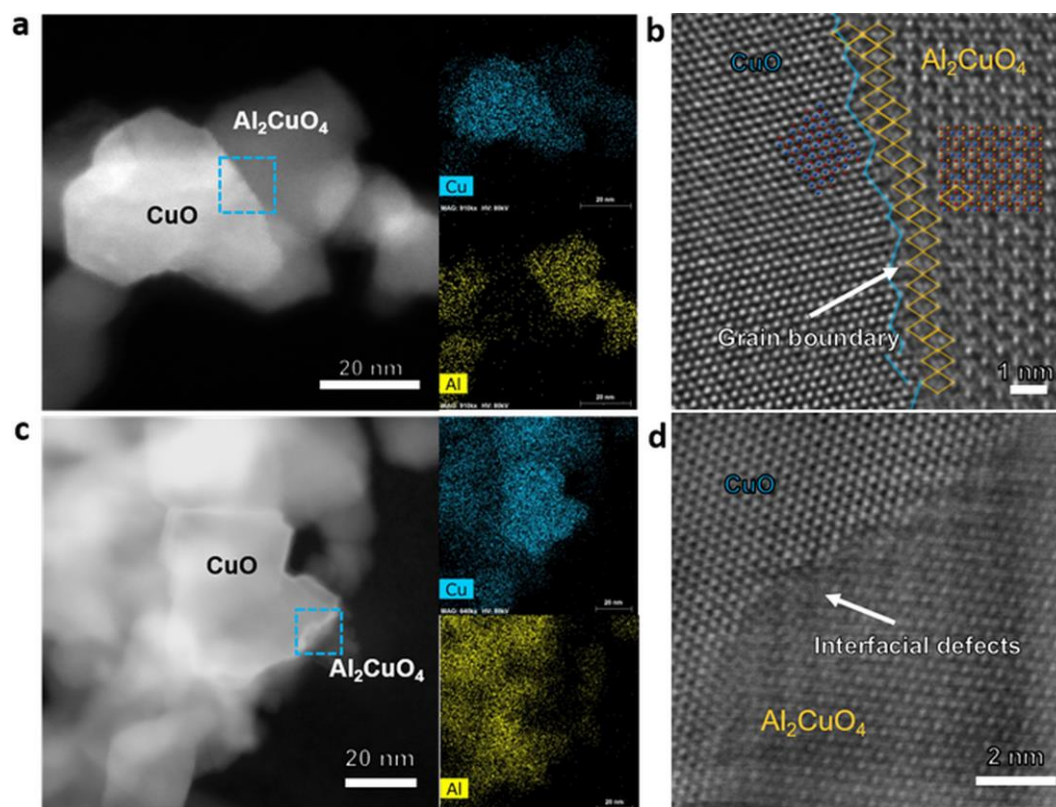

**Fig. S10.** (a, c) HAADF-STEM images and their corresponding individual element maps of Cu and Al in CuAl-3. (b, d) HAADF-STEM images at the CuO/ $\text{Al}_2\text{CuO}_4$  interface, taken from the region marked in (a, c), respectively.

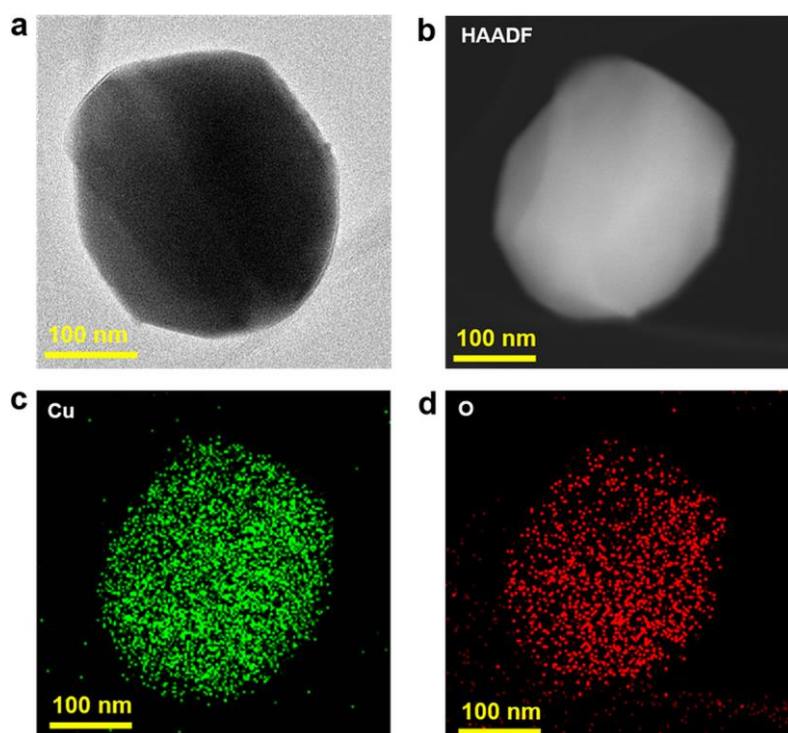

**Fig. S11.** Morphology characterization of CuO. (a) TEM image (b) HAADF-STEM image and (c and d) corresponding individual element maps of Cu and O.

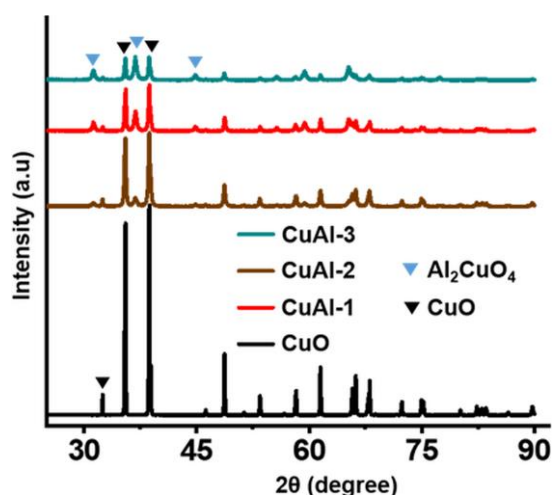

**Fig. S12.** XRD spectra for CuO, CuAl-1, CuAl-2 and CuAl-3 catalysts: The XRD pattern of CuO catalyst shows the diffraction peaks at position  $2\theta$  of  $32.52^\circ$ ,  $35.49^\circ$ ,  $38.68^\circ$ ,  $48.66^\circ$ ,  $58.25^\circ$ ,  $61.52^\circ$ ,  $66.15^\circ$ , and  $68.88^\circ$ , corresponding respectively (110), (-111), (111), (-202), (202), (-113), (-311) and (220) planes of monoclinic CuO crystal structure (JCPDS# 01-080-1916). In XRD patterns of CuAl-1 to CuAl-3 catalysts, the peaks related to the monoclinic Cu crystal structure weakened in favor of new diffraction peaks at  $31.26^\circ$ ,  $36.86^\circ$ ,  $44.79^\circ$ , and  $55.62^\circ$  that can be assigned respectively to (220), (311), (400) and (422) lattices of  $\text{Al}_2\text{CuO}_4$  (JCPDS# 01-076-2295). The new evolved peaks grew in intensity with increasing the amount of Al in the catalysts.

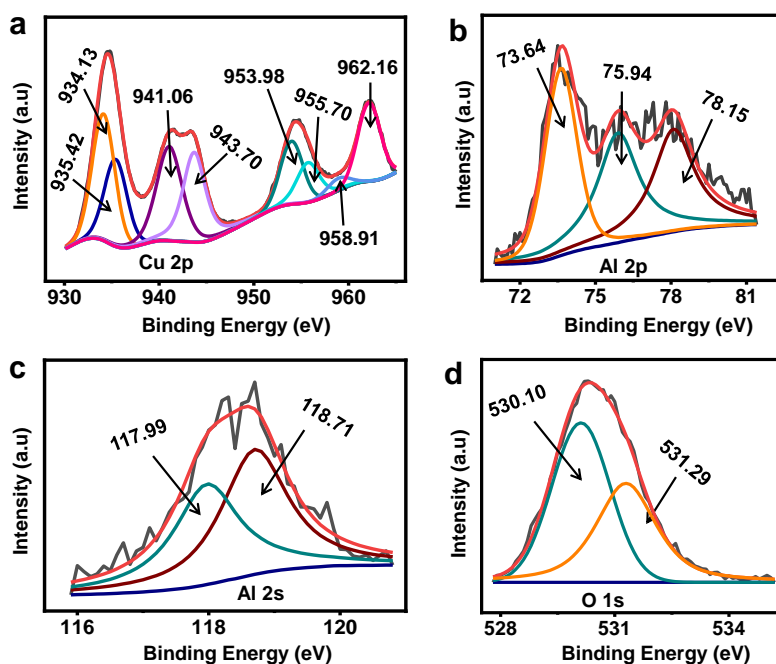

**Fig. S13.** XPS core-level spectra of CuAl-1 (a) Cu 2p (b) Al 2p (c) Al 2s (d) O 1s.

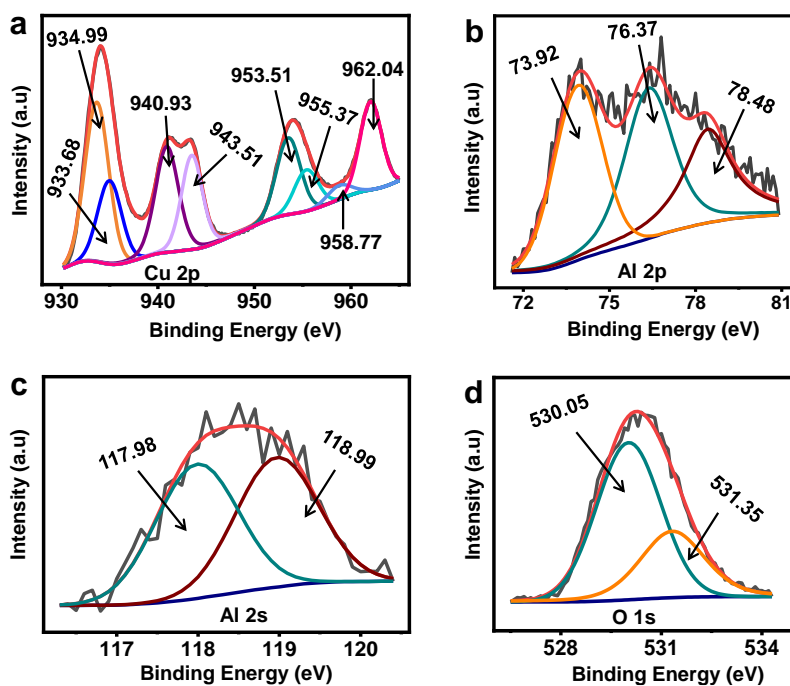

Fig. S14. XPS core-level spectra of CuAl-2 (a) Cu 2p (b) Al 2p (c) Al 2s (d) O 1s.

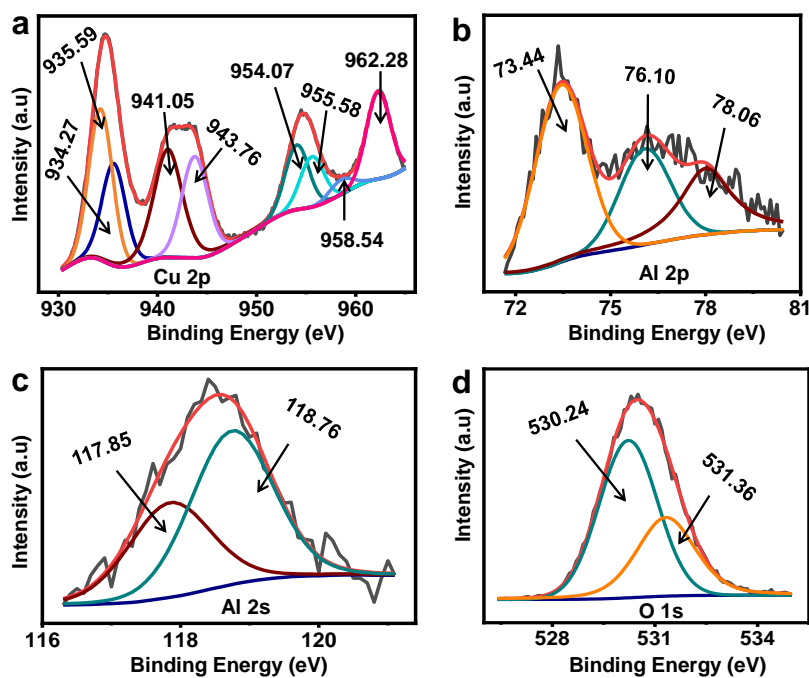

Fig. S15. XPS core-level spectra of CuAl-3 (a) Cu 2p (b) Al 2p (c) Al 2s (d) O 1s.

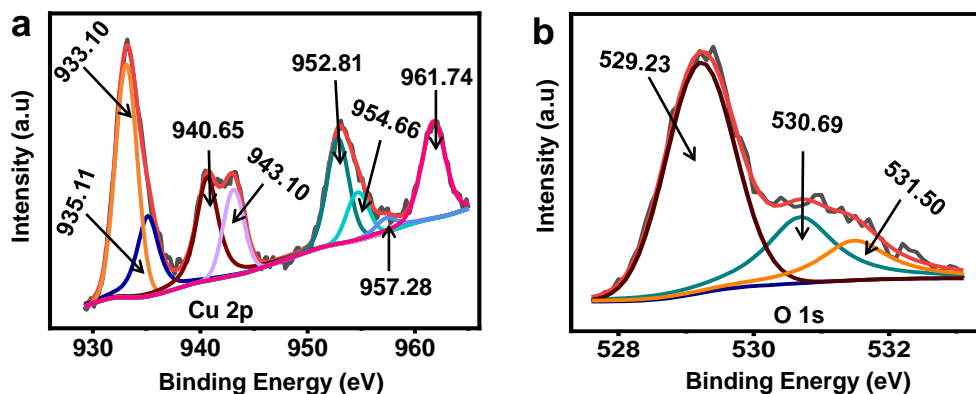

**Fig S16.** XPS core-level spectra of CuO (a) Cu 2p (b) O 1s. The O-1s XPS spectrum shows two peaks of metal oxide species at 530.69 and 531.50 eV and one peak of the lattice oxygen at 529.23 eV.<sup>4</sup>

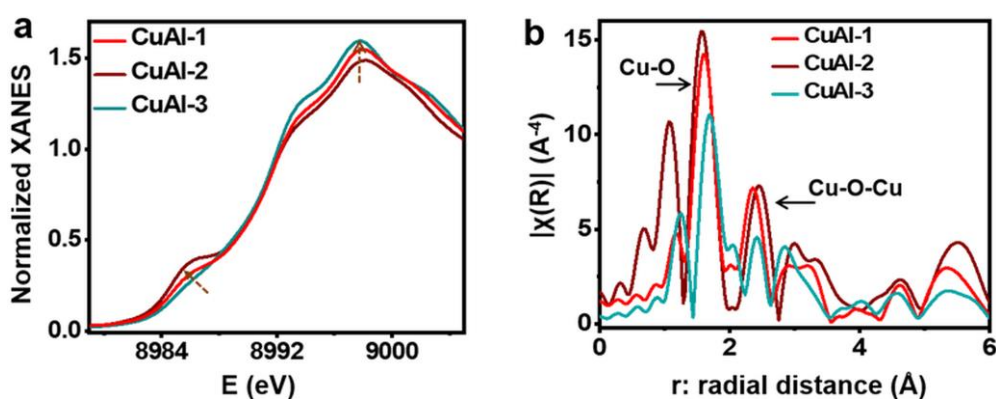

**Fig. S17.** X-ray absorption spectra CuAl-1, CuAl-2 and CuAl-3 catalysts. (a) XANES spectra in real space at Cu K-edges. The Cu K-edges from CuAl-1 to CuAl-3 gradually shifts to the high-energy direction and the white-line peak intensity increases from CuAl-1 to CuAl-3, suggesting that the average oxidation state of Cu increased with the increase of Al amount from CuAl-1 to CuAl-3. (b) FT-EXAFS spectra in r-space. The FT-EXAFS spectra are consistent with the XANES data.



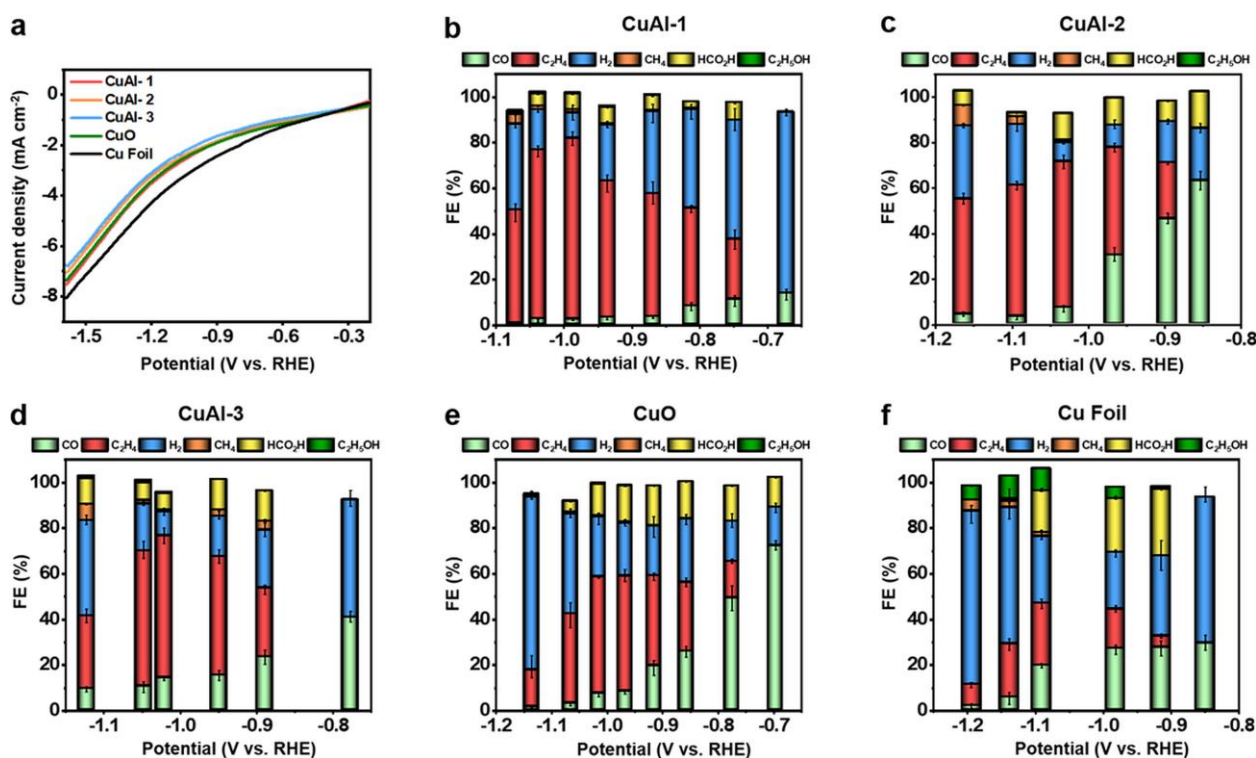

**Fig. S18.** Linear sweep voltammograms (LSVs) curves and overall gas and liquid products during the electrocatalytic  $\text{CO}_2\text{RR}$  of CuAl-1, CuAl-2, CuAl-3, CuO and electropolished polycrystalline Cu foil in an H-cell. (a) LSV curves in  $\text{CO}_2$  saturated 0.1 M  $\text{KHCO}_3$  electrolyte. (b-f) Product distributions ( $\text{CO}$ ,  $\text{C}_2\text{H}_4$ ,  $\text{H}_2$ ,  $\text{CH}_4$ ,  $\text{HCO}_2\text{H}$  and  $\text{C}_2\text{H}_5\text{OH}$ ) and corresponding Faradaic efficiencies produced by (b) CuAl-1 (c) CuAl-2 (d) CuAl-3 (e) CuO and (f) electropolished polycrystalline Cu foil at different applied potentials in  $\text{CO}_2$  saturated 0.1 M  $\text{KHCO}_3$  electrolyte.

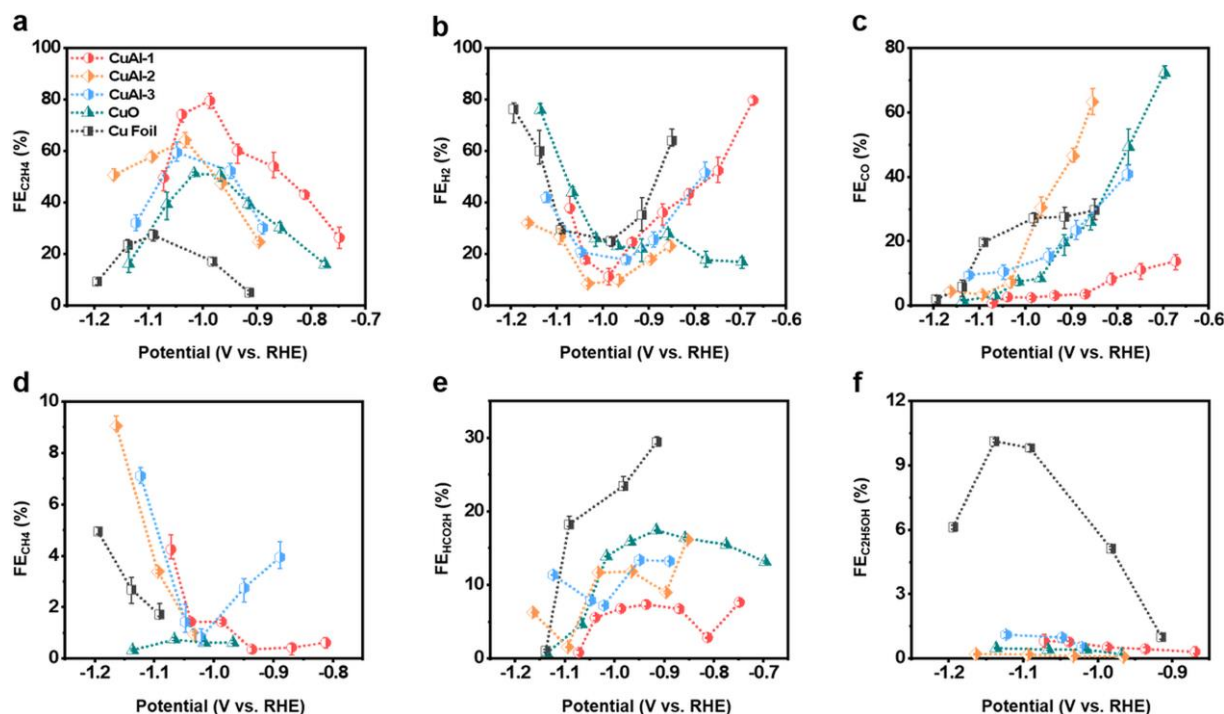

**Fig. S19.** Comparison of Faradaic efficiencies for different gaseous and liquid products on CuAl-1, CuAl-2, CuAl-3, CuO and electropolished polycrystalline Cu foil in an H-cell. (a)  $\text{C}_2\text{H}_4$  Faradaic efficiencies (b)  $\text{H}_2$  Faradaic efficiencies (c)  $\text{CO}$  Faradaic efficiencies (d)  $\text{CH}_4$  Faradaic efficiencies (e)  $\text{HCO}_2\text{H}$  Faradaic efficiencies (f)  $\text{C}_2\text{H}_5\text{OH}$  Faradaic efficiencies.

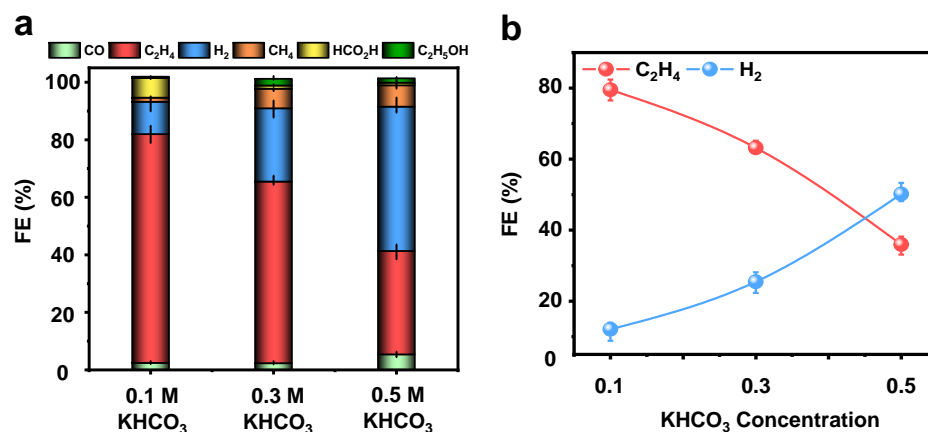

**Fig. S20.** Electrocatalytic  $\text{CO}_2\text{RR}$  of CuAl-1 in H-cell with  $\text{CO}_2$  saturated with different concentrations of  $\text{CO}_2$  saturated  $\text{KHCO}_3$  electrolytes. (a) Product distributions ( $\text{CO}$ ,  $\text{C}_2\text{H}_4$ ,  $\text{H}_2$ ,  $\text{CH}_4$ ,  $\text{HCO}_2\text{H}$  and  $\text{C}_2\text{H}_5\text{OH}$ ) and corresponding Faradaic efficiencies (b)  $\text{C}_2\text{H}_4$  and  $\text{H}_2$  Faradaic efficiencies along with the concentration of  $\text{KHCO}_3$  electrolyte. The  $\text{CO}_2\text{RR}$  on CuAl-1 in the H-cell under the different  $\text{KHCO}_3$  concentrations indicate that  $\text{CO}_2\text{RR}$  to  $\text{C}_2\text{H}_4$  is more favorable in a dilute  $\text{KHCO}_3$  solution. However, under a high  $\text{KHCO}_3$  concentration, the production of  $\text{H}_2$  and  $\text{CH}_4$  was promoted and ethylene was suppressed. Electrolytes with high buffer capacity such as concentrated  $\text{KHCO}_3$  solution with high proton concentrations allowed coupled electron/proton transfer and therefore promotes the higher yield of  $\text{H}_2$  and  $\text{CH}_4$  production. On the other hand, electrolytes with low buffer capacity such as diluted  $\text{KHCO}_3$  solution make the formation of  $\text{H}_2$  and  $\text{CH}_4$  less favorable due to a low proton concentration near the surface and increased the formation of  $\text{C}_2^+$  product. Also, in concentrated  $\text{KHCO}_3$  solution, a large amount of  $\text{K}^+$  ions are attached near the cathode due to its positive electric property which blocks the access of the  $\text{CO}_2$  molecule to the cathode surface and suppresses the  $\text{CO}_2\text{RR}$ .

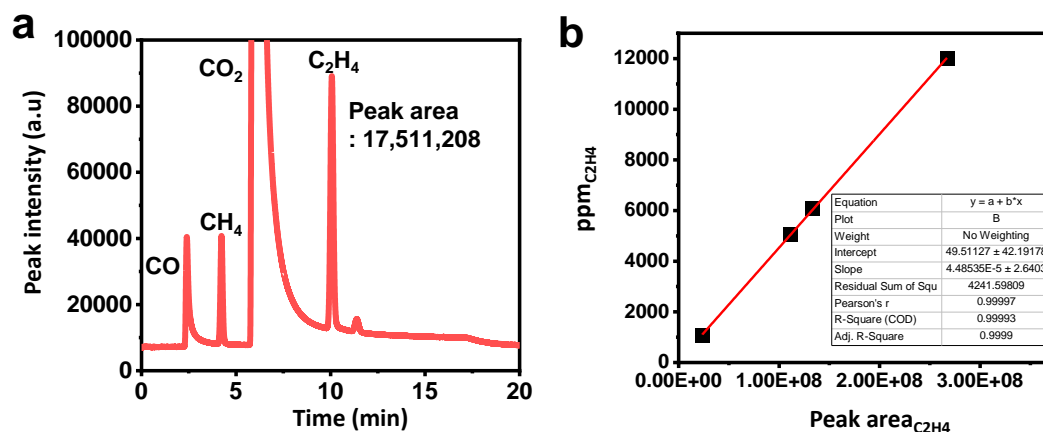

**Fig. S21.** (a) Raw GC Flame ionization detector data of  $\text{CO}_2\text{RR}$  for CuAl-1 in H-cell with  $\text{CO}_2$  saturated 0.1 M  $\text{KHCO}_3$  electrolyte at  $-0.99 \text{ V}_{\text{RHE}}$  (b) GC calibration data of  $\text{C}_2\text{H}_4$ .

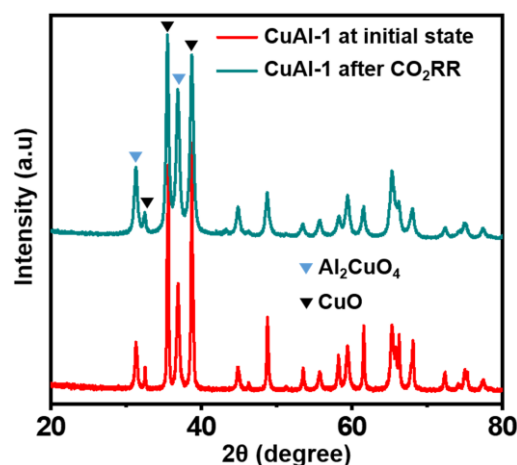

**Fig. S22.** Comparison of XRD spectra of CuAl-1 before and after CO<sub>2</sub>RR stability test. The position of the peaks for CuAl-1 before and after the CO<sub>2</sub>RR stability test remains almost the same.

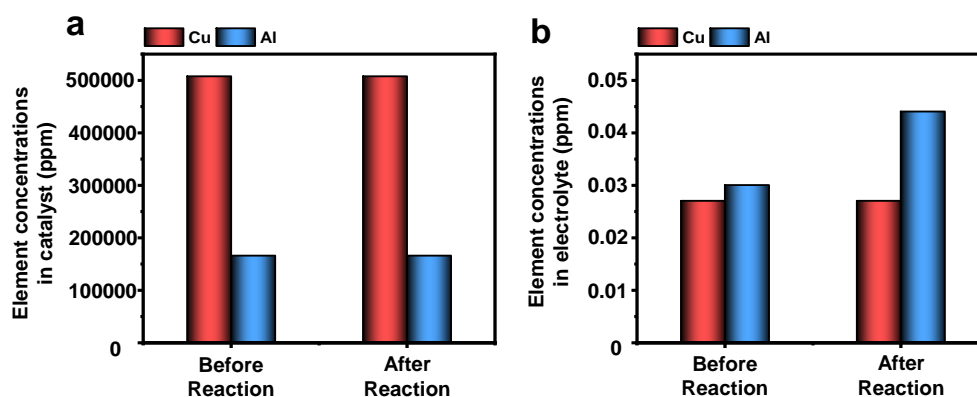

**Fig. S23.** ICP-OES analysis of the CuAl-1 before and after the CO<sub>2</sub>RR stability test. (a) The concentration of Cu and Al (ppm) in CuAl-1 before and after the stability test. The terms before reaction and after reaction in Fig. (a) refer to the catalyst in the initial state and after the long-term stability test. (b) The concentration of Cu and Al (ppm) in working electrolyte before and after stability test. The terms before reaction and after reaction in Fig. (a) refer to electrolytes before the applied potential and after the long-term stability test. According to ICP-OES analysis data, the Cu and Al do not leach into the solution, which indicates that the Cu/Al components in the CuAl-1 catalyst were well preserved during the long-term CO<sub>2</sub>RR stability test.

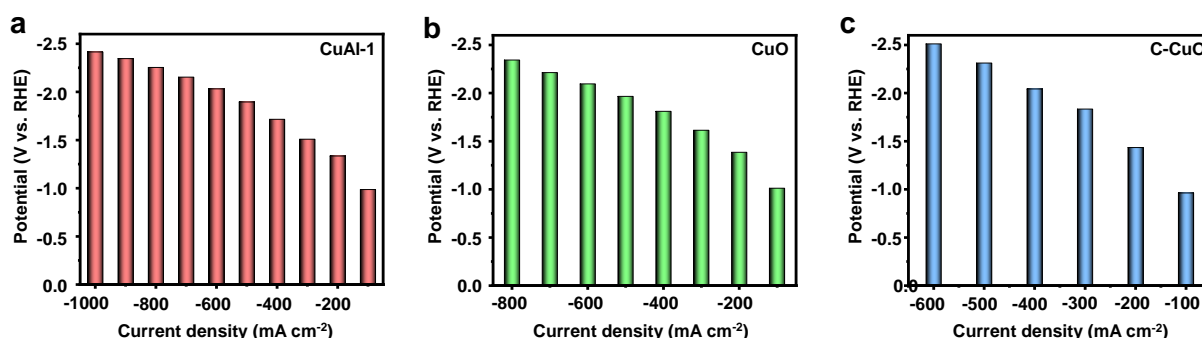

**Fig. S24.** The overpotential values versus RHE at applied current densities (100-1000 mA cm<sup>-2</sup>) via chronopotentiometry test for the electrochemical CO<sub>2</sub>RR on CuAl-1, as-synthesized CuO and commercial CuO in flow cells with CO<sub>2</sub> saturated 1 M KOH electrolyte. (a) CuAl-1 (b) as-synthesized CuO and (c) commercial CuO.

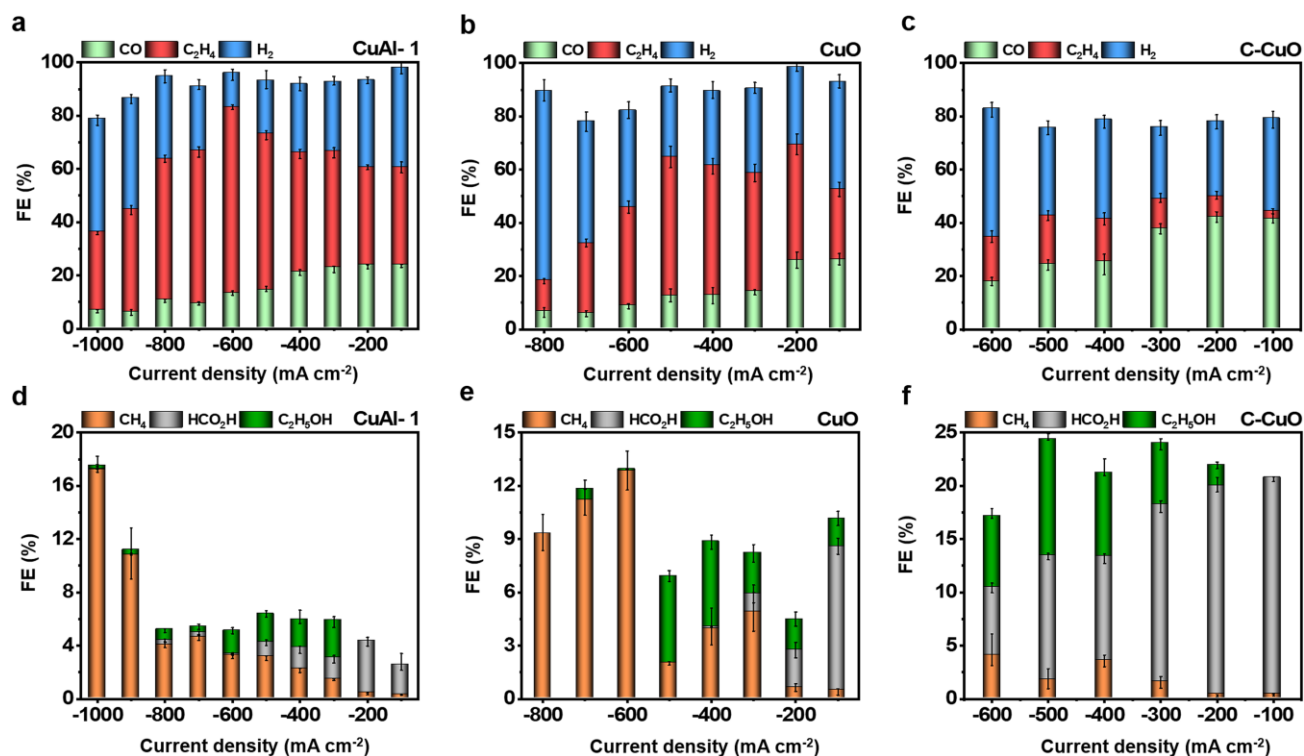

**Fig. S25.** Electrocatalytic CO<sub>2</sub>RR of CuAl-1, as-synthesized CuO and commercial CuO in flow cells with CO<sub>2</sub> saturated 1 M KOH electrolyte. (a-c) Co, C<sub>2</sub>H<sub>4</sub> and H<sub>2</sub> product distributions and corresponding Faradaic efficiencies produced by (a) CuAl-1 (b) as-synthesized CuO and (c) commercial CuO. (d-f) CH<sub>4</sub>, HCO<sub>2</sub>H and C<sub>2</sub>H<sub>5</sub>OH product distributions and corresponding Faradaic efficiencies produced by (d) CuAl-1 (e) as-synthesized CuO and (f) commercial CuO.

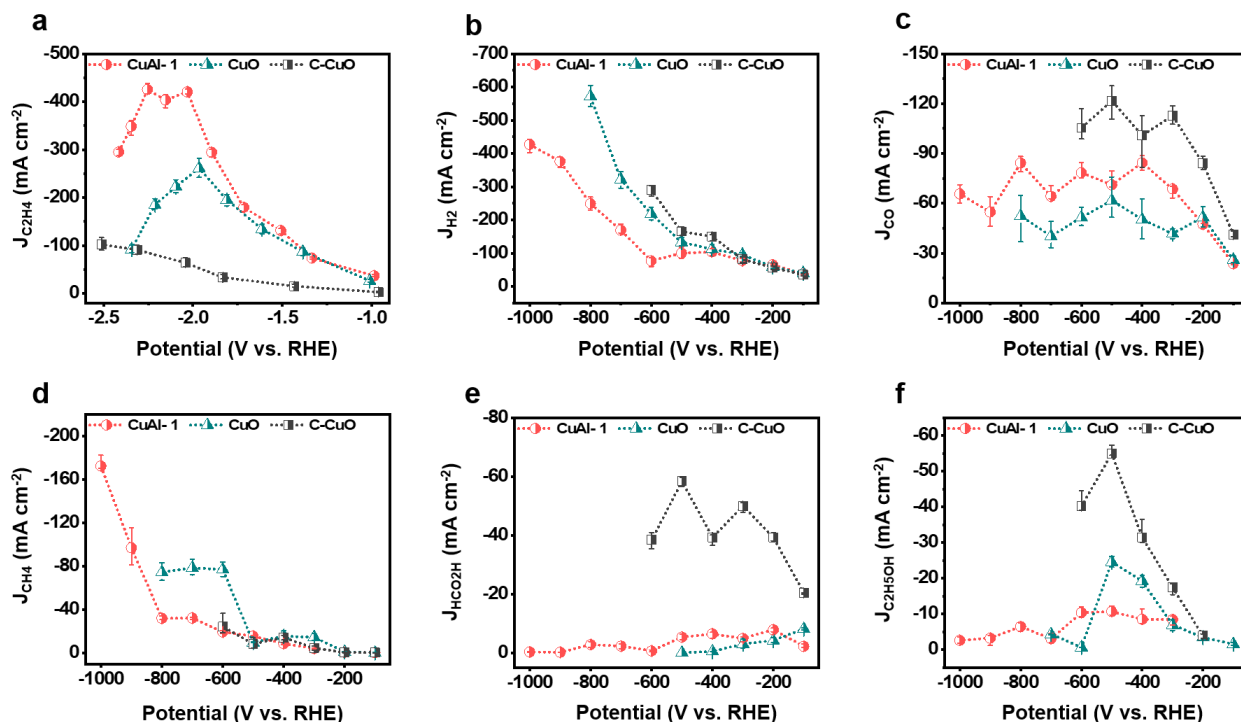

**Fig. S26.** Comparison of Partial current density for different gaseous and liquid products on CuAl-1, as-synthesized CuO and commercial CuO in flow cells with CO<sub>2</sub> saturated 1 M KOH electrolyte. (a) Partial current density of C<sub>2</sub>H<sub>4</sub> (b) Partial current density of H<sub>2</sub> (c) Partial current density of Co (d) Partial current density of CH<sub>4</sub> (e) Partial current density of HCO<sub>2</sub>H (f) Partial current density of C<sub>2</sub>H<sub>5</sub>OH.

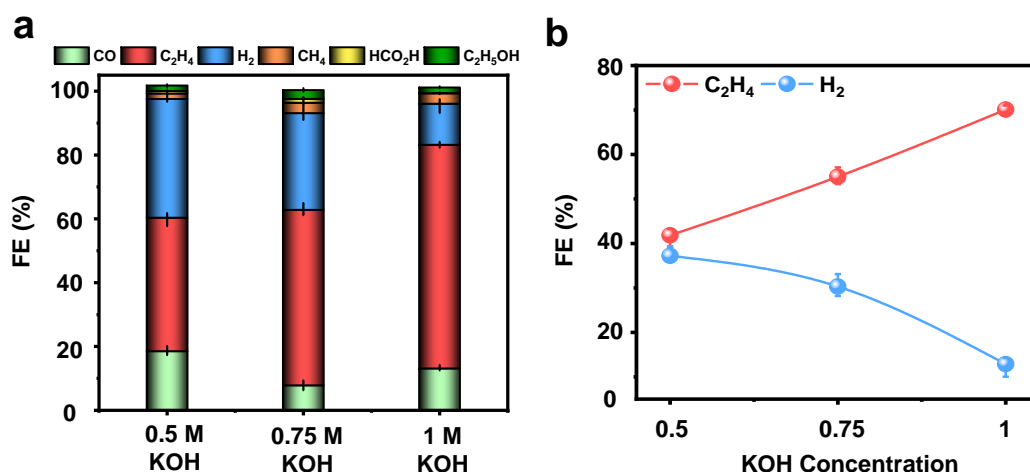

**Fig. S27.** Electrocatalytic CO<sub>2</sub>RR of CuAl-1 in the flow cells with different concentrations of CO<sub>2</sub> saturated KOH electrolytes at 600 mAcm<sup>-2</sup> (a) Product distributions (CO, C<sub>2</sub>H<sub>4</sub>, H<sub>2</sub>, CH<sub>4</sub>, HCO<sub>2</sub>H and C<sub>2</sub>H<sub>5</sub>OH) and corresponding Faradaic efficiencies (b) C<sub>2</sub>H<sub>4</sub> and H<sub>2</sub> Faradaic efficiencies along with the concentration of KOH electrolyte. The CO<sub>2</sub>RR on CuAl-1 in the flow cell under the different KOH concentrations indicate that CO<sub>2</sub>RR to C<sub>2</sub>H<sub>4</sub> is more favorable in a concentrated KOH solution. It is ascribed to the fact that the concentrated KOH solution helps in HER suppression during the CO<sub>2</sub>RR (HER has sluggish kinetics in a highly alkaline pH) and also the high concentration of OH<sup>-</sup> ions reduces the energy barrier for C–C coupling facilitating the formation of C<sub>2+</sub> product rather than C<sub>1</sub> or H<sub>2</sub> formation.

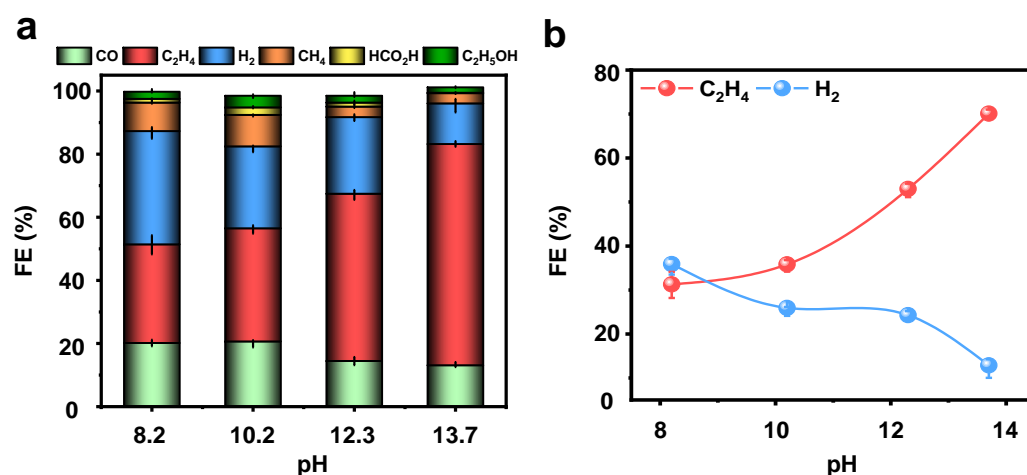

**Fig. S28.** Electrocatalytic CO<sub>2</sub>RR of CuAl-1 in the flow cells with different pH values at 600 mAcm<sup>-2</sup>. The pH values were adjusted to 8.2, 10.2, 12.3 and 13.7 by mixing the different volumes of 1M KHCO<sub>3</sub> and 1M KOH solutions in working electrolyte (a) Product distributions (CO, C<sub>2</sub>H<sub>4</sub>, H<sub>2</sub>, CH<sub>4</sub>, HCO<sub>2</sub>H and C<sub>2</sub>H<sub>5</sub>OH) and corresponding Faradaic efficiencies (b) C<sub>2</sub>H<sub>4</sub> and H<sub>2</sub> Faradaic efficiencies along with increasing pH.

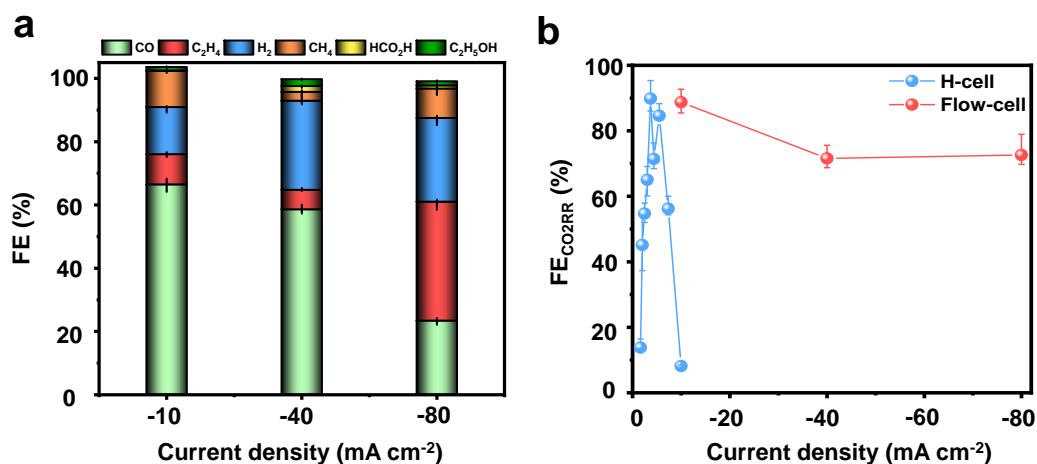

**Fig. S29.** (a) Electrocatalytic CO<sub>2</sub>RR of CuAl-1 in the flow cells with CO<sub>2</sub> saturated 0.1 M KHCO<sub>3</sub> electrolyte (b) Comparison of Electrocatalytic CO<sub>2</sub>RR of CuAl-1 in H-cell and Flow cell with CO<sub>2</sub> saturated 0.1 M KHCO<sub>3</sub> electrolyte. Fig. b shows that HER occurs dominantly at high current density (-10 mA cm<sup>-2</sup>) in H-cell due to the low mass transfer issue of the CO<sub>2</sub> to the cathode part. On the other hand, the 0.1 M KCO<sub>3</sub> in the flow cell maintained high selectivity toward CO<sub>2</sub>RR at the relatively high current densities, however, the flow cell with CO<sub>2</sub> saturated 0.1 M KHCO<sub>3</sub> electrolyte cannot achieve a high-density value compared to 1M KOH solution, since the 0.1 M KHCO<sub>3</sub> electrolyte requires high overpotential due to its high ohmic resistance/ohmic losses and poor conductivity as well as the poor oxygen evolution reaction performance of anode catalyst in neutral solutions (CO<sub>2</sub>RR process pairs two half-reactions of CO<sub>2</sub> reduction and OER. In our study, the NiFeMo alloy was used as an anode).

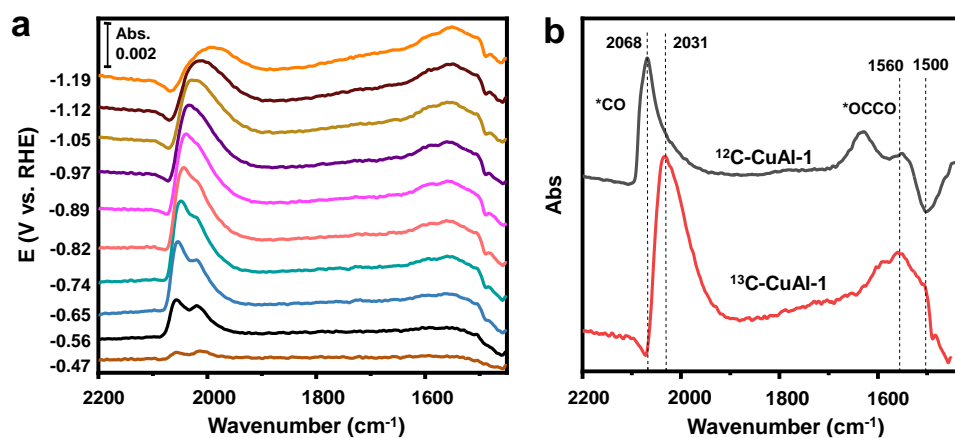

**Fig. S30.** In situ ATR-SEIRAS analysis for an isotope labelling experiment on CuAl-1. (a) Potential-dependent IR spectra of CuAl-1 during chronoamperometric scans from -0.47 V to -1.19 V. (b) <sup>13</sup>C labelled IR spectrum (red) of CuAl-1 at -0.97 V in <sup>13</sup>CO<sub>2</sub> saturated 0.1M KHCO<sub>3</sub> D<sub>2</sub>O electrolyte with baseline spectra at -0.37 V in <sup>13</sup>CO<sub>2</sub> saturated electrolyte. IR spectrum (black) at -0.97 V (<sup>12</sup>C marked) is also presented as a reference. Experimental condition: <sup>13</sup>CO<sub>2</sub> saturated 0.1M KHCO<sub>3</sub> D<sub>2</sub>O electrolyte with the baseline spectrum at -0.37 V.



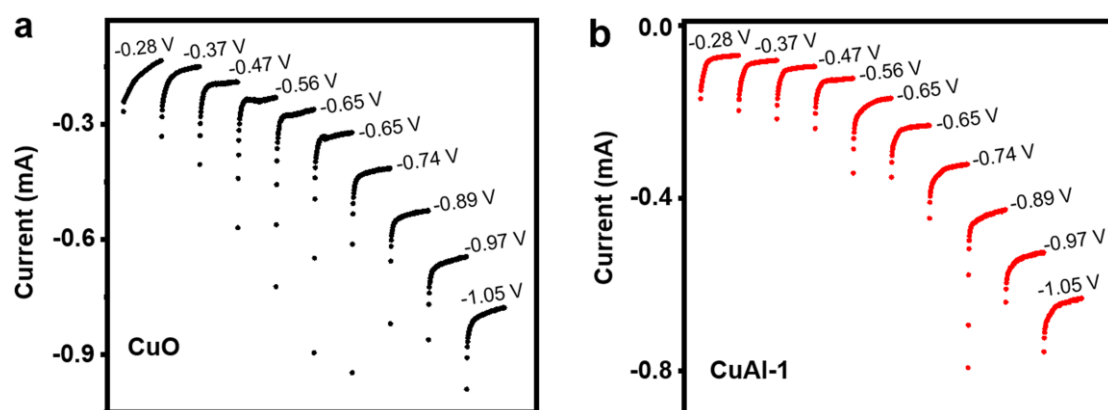

**Fig. S31.** Chronoamperometric curves of (a) CuO and (b) CuAl-1 at various individual applied potentials in a CO<sub>2</sub> saturated 0.1 M KHCO<sub>3</sub> electrolyte during the ATR-SEIRAS measurement. The potential mention in this figure corresponds to the RHE scale.

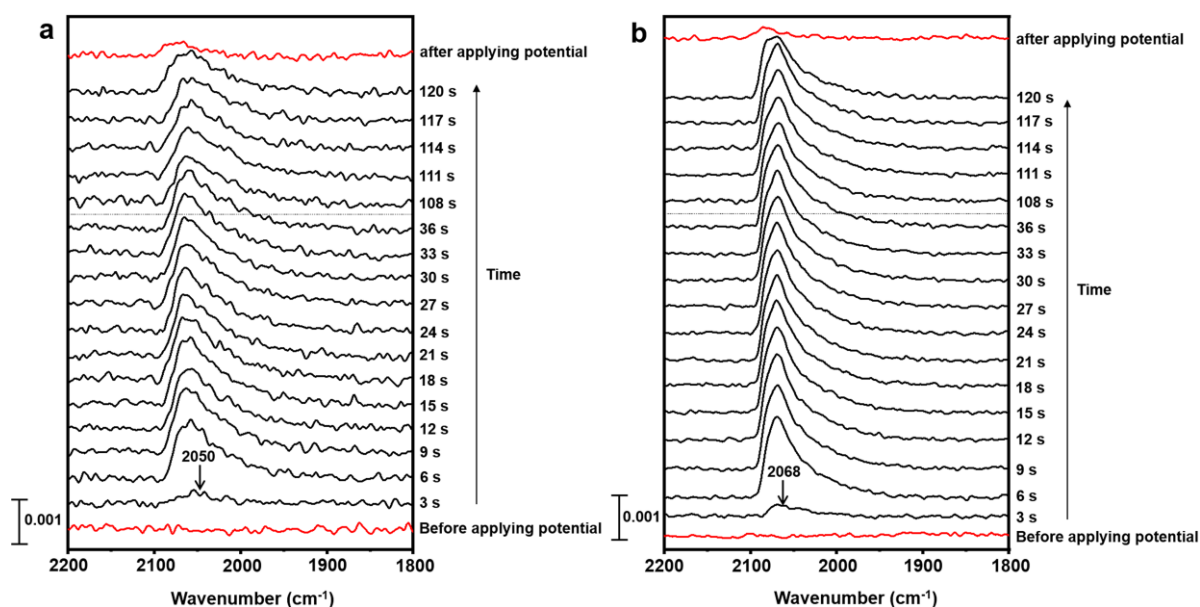

**Fig. S32.** Time-resolved IR spectra of (a) CuO and (b) CuAl-1 for an initial 2 min. The spectra were taken in 0.1 M KHCO<sub>3</sub> D<sub>2</sub>O electrolyte at -0.97 V with the baseline spectra at -0.28 V in CO<sub>2</sub> saturated electrolyte. The potential mention in this figure corresponds to the RHE scale.

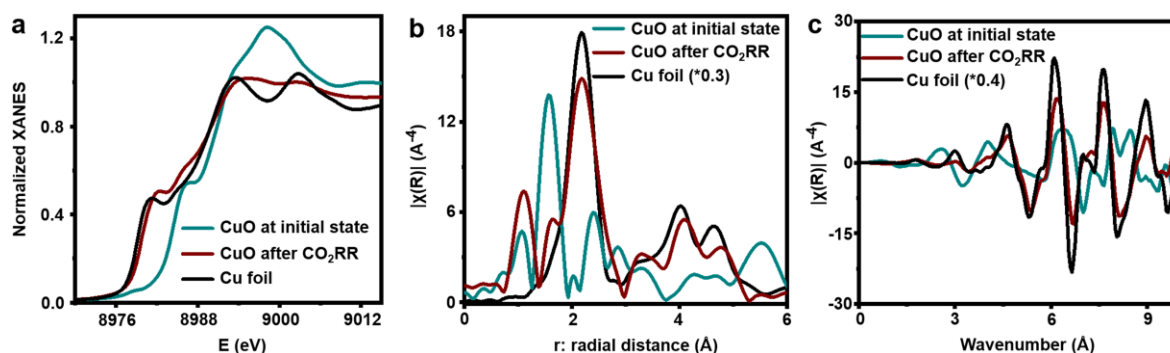

**Fig. S33.** Comparison of X-ray absorption spectra of CuO catalyst before and after CO<sub>2</sub>RR test along with Cu foil reference. (a) XANES spectra in real space at Cu K-edges in CuO. (b) FT-EXAFS spectra in r-space. (c) k<sup>3</sup>χ oscillation signal in k-space. The Cu K-edge of CuO after the CO<sub>2</sub>RR test shows nearly identical pre-edge and white-line peaks the spectrum of a metallic Cu foil. The FT-EXAFS spectra of CuO after the CO<sub>2</sub>RR test are consistent with the XANES data; a new strong peak appeared at 2.17 Å, corresponding to the Cu-Cu bonds in metallic Cu. The k<sup>3</sup>χ oscillation signal of CuO after the CO<sub>2</sub>RR test exhibits almost a similar shape in oscillating frequency to the metallic Cu foil.

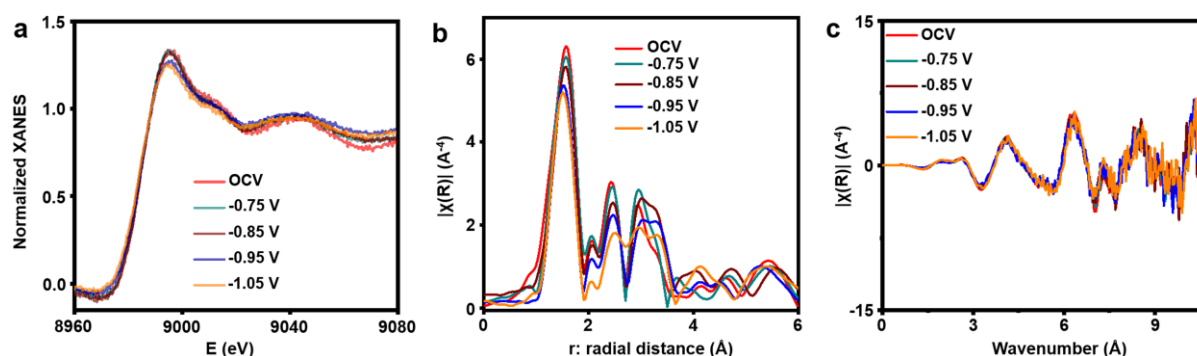

**Fig. S34.** Operando X-ray absorption analysis to investigate the CuAl-1 status during the electrochemical CO<sub>2</sub>RR at different applied potentials from the open-circuit voltage (OCV) down to -1.05 V in CO<sub>2</sub> saturated 0.1 M KHCO<sub>3</sub> solution. (a) XANES spectra in real space at Cu K-edges. (b) FT-EXAFS spectra in r-space. (c) k<sup>3</sup>χ oscillation signal in k-space. The pre-edge and white-line peaks of Cu K-edge at -0.75 and -0.85 V are almost the same as the spectra of OCV, suggesting that the CuO state in CuAl-1 remains the same during the CO<sub>2</sub>RR. At -0.95 and -1.05 V, the Cu K-edge shifted very slightly toward lower energy and the intensity of white-line peaks was little reduced, indicating that CuO in CuAl-1 is very slightly reduced during CO<sub>2</sub>RR. The FT-EXAFS spectra and k<sup>3</sup>χ (k) oscillation curves are consistent with the XANES data.

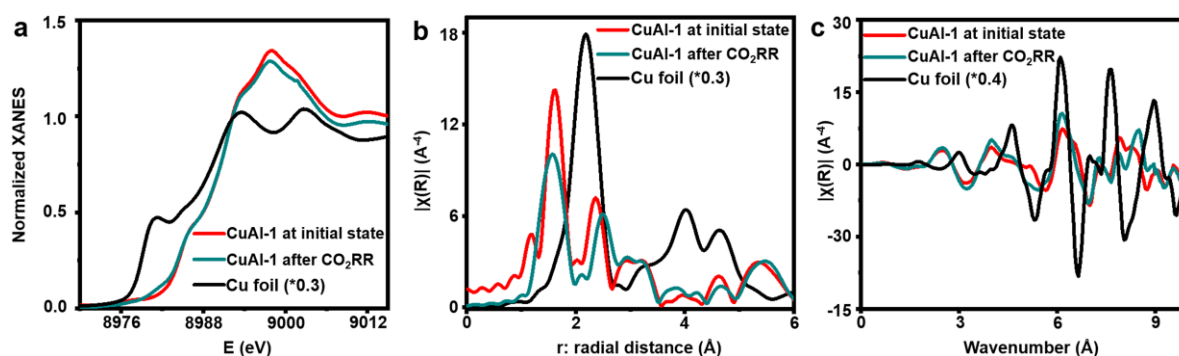

**Fig. S35.** Comparison of X-ray absorption spectra of CuAl-1 catalyst before and after CO<sub>2</sub>RR test along with Cu foil reference. (a) XANES spectra in real space at Cu K-edges in CuAl-1. (b) FT-EXAFS spectra in r-space. (c) k<sup>3</sup>χ oscillation signal in k-space. The Cu K-edge of CuAl-1 after the CO<sub>2</sub>RR test shows a very small shift towards lower energy compare to pristine CuAl-1, indicating that CuO in CuAl-1 is very slightly reduced during CO<sub>2</sub>RR. The radial distance in the FT-EXAFS spectra of CuAl-1 (before and after CO<sub>2</sub>RR) are almost the same except for a small shift in the CuO peak towards a lower radial distance after the CO<sub>2</sub>RR test. The k<sup>3</sup>χ (k) oscillation curves of CuAl-1 after the CO<sub>2</sub>RR test show a similar shape in oscillating frequency to that of the pristine electrode and obviously different from that of Cu foil.

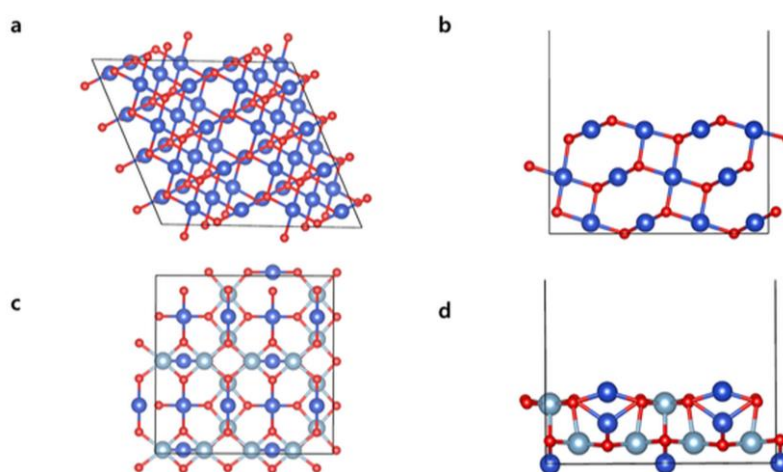

**Fig. S36.** DFT-optimized structures. (a) Top view and (b) side view of CuO (111) surface slab model. (c) Top view and (d) side view of Al<sub>2</sub>CuO<sub>4</sub> (004) surface slab model. Al, Cu, and O are shown as cyan, blue, and red, respectively.

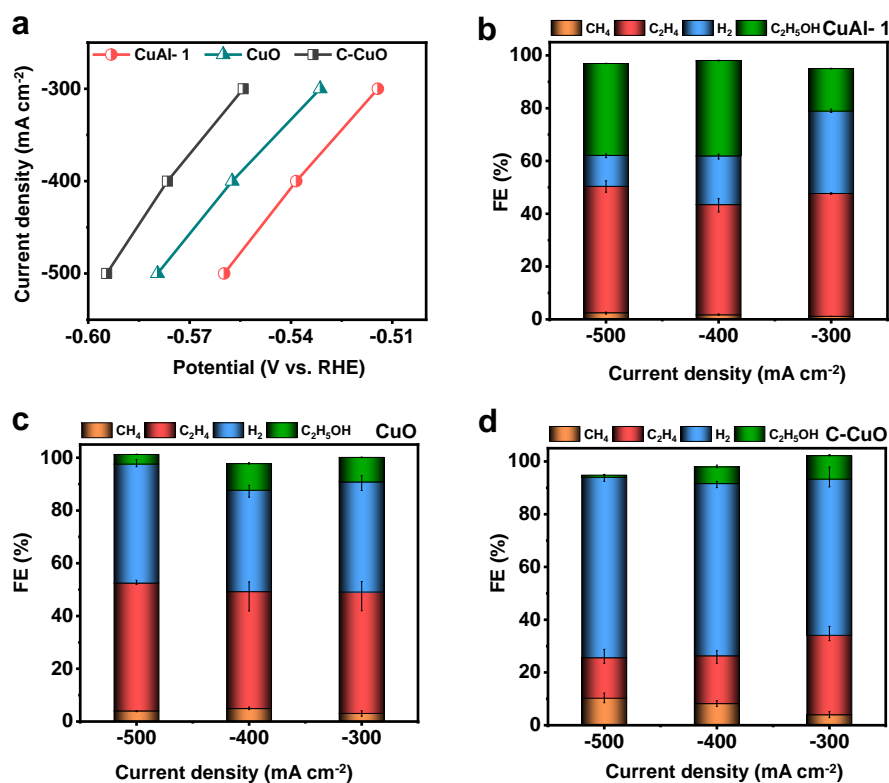

**Fig. S37.** Electrocatalytic CO<sub>2</sub>RR of CuAl-1, as-synthesized CuO and commercial CuO in flow cells with CO saturated 1 M KOH electrolyte. (a) The overpotential values versus RHE at applied current densities (300-500 mA cm<sup>-2</sup>) via chronopotentiometry test for the electrochemical CO<sub>2</sub>RR on CuAl-1, as-synthesized CuO and commercial CuO (b-d) CH<sub>4</sub>, C<sub>2</sub>H<sub>4</sub>, H<sub>2</sub>, C<sub>2</sub>H<sub>5</sub>OH product distributions and corresponding Faradaic efficiencies produced by (b) CuAl-1 (c) as-synthesized CuO and (d) commercial CuO.

**Table S1.** Inductively coupled plasma optical emission spectroscopy (ICP-OES) chemical composition analysis. The ICP-OES analysis of the CuAl-1 to CuAl-3 was performed to investigate the wt.% of Cu and Al in each catalyst.

| Catalysts | Cu (wt.%) | Al (wt.%) | Cu:Al (wt.% ratio) |
|-----------|-----------|-----------|--------------------|
| CuAl-1    | 51.75     | 15.54     | 76.91:23.09        |
| CuAl-2    | 67.00     | 6.86      | 90.71:9.29         |
| CuAl-3    | 44.15     | 20.79     | 67.99:32.01        |

**Table S2.** DFT-calculated surface energies of  $\text{Al}_2\text{CuO}_4$  for (004) and (220) surfaces, and CO binding free energies on both surfaces.

|                                          | $\text{Al}_2\text{CuO}_4$ (004) | $\text{Al}_2\text{CuO}_4$ (220) | $\text{Al}_2\text{CuO}_4$ (111) |
|------------------------------------------|---------------------------------|---------------------------------|---------------------------------|
| Surface Energy ( $\text{J}/\text{m}^2$ ) | 1.23                            | 1.47                            | 1.87                            |
| *CO Binding Free Energy (eV)             | -0.68                           | -0.34                           | 0.09                            |

**Table S3.** DFT-calculated hydrogen binding energy,  $\Delta G_{\text{H}}$  on CuO (111) surface and  $\text{Al}_2\text{CuO}_4$  (004) surface.

| Surface                         | $\Delta G_{\text{H}}$ (eV) |
|---------------------------------|----------------------------|
| CuO (111)                       | 0.63                       |
| $\text{Al}_2\text{CuO}_4$ (004) | 0.97                       |

**Table S4.** Comparison of electrochemical CO<sub>2</sub>RR performances of CuAl-1 for C<sub>2</sub>H<sub>4</sub> with recent reported state-of-the-art Cu-based catalysts in H-cells.

| Catalysts                  | Electrolyte              | FE <sub>C<sub>2</sub>H<sub>4</sub></sub> (%) | Potential (V <sub>RHE</sub> ) | Reference |
|----------------------------|--------------------------|----------------------------------------------|-------------------------------|-----------|
| CuAl- I                    | 0.1 M KHCO <sub>3</sub>  | 82.40                                        | -0.99                         | This Work |
| CuO                        | 0.1 M KHCO <sub>3</sub>  | 51.28                                        | -1.02                         | This Work |
| Cu Foil                    | 0.1 M KHCO <sub>3</sub>  | 27.37                                        | -1.09                         | This Work |
| Anodized copper            | 0.1 M KHCO <sub>3</sub>  | 38.1                                         | -1.08                         | 5         |
| Copper(I) oxide films      | 0.1 M KHCO <sub>3</sub>  | 40.00                                        | -0.99                         | 6         |
| Cu NP/C                    | 0.1 M KHCO <sub>3</sub>  | 40.50                                        | -1.38                         | 7         |
| Cu Cube                    | 0.1 M KHCO <sub>3</sub>  | 41.00                                        | -1.10                         | 8         |
| Cu-I                       | 0.1 M KI                 | 48.00                                        | -0.95                         | 9         |
| Cu(B)-2                    | 0.1 M KCl                | 52.00                                        | -1.10                         | 10        |
| CuCl-derived catalyst      | 0.05 M KHCO <sub>3</sub> | 56.00                                        | -1.90                         | 11        |
| Cu <sub>2</sub> O NP/C     | 0.1 M KHCO <sub>3</sub>  | 57.3                                         | -1.10                         | 12        |
| Nanostructured oxide layer | 0.1 M KHCO <sub>3</sub>  | 60.00                                        | -0.90                         | 13        |
| Branched CuO               | 0.1 M KHCO <sub>3</sub>  | 68.00                                        | -1.05                         | 14        |
| Cu nanowire                | 0.1 M KHCO <sub>3</sub>  | >70.00                                       | -1.00                         | 15        |



## References

- 1 M. Ma, E. L. Clark, K. T. Therkildsen, S. Dalsgaard, I. Chorkendorff and B. Seger, *Energy Environ. Sci.*, 2020, **13**, 977-985.
- 2 Y. Kim, S. Park, S.-J. Shin, W. Choi, B. K. Min, H. Kim, W. Kim and Y. J. Hwang, *Energy Environ. Sci.*, 2020, **13**, 4301-4311.
- 3 L. Li, L. Shi, X. Yu, S. Qing, Z. Gao, Q. Luo, G. Feng and R. Zhang, *Chin. Chem. Lett.*, 2019, **30**, 1147-1152.
- 4 S. Sultan, M. Ha, D. Y. Kim, J. N. Tiwari, C. W. Myung, A. Meena, T. J. Shin, K. H. Chae and K. S. Kim, *Nat. Commun.*, 2019, **10**, 5195.
- 5 S. Y. Lee, H. Jung, N.-K. Kim, H.-S. Oh, B. K. Min and Y. J. Hwang, *J. Am. Chem. Soc.*, 2018, **140**, 8681-8689.
- 6 D. Ren, Y. Deng, A. D. Handoko, C. S. Chen, S. Malkhandi and B. S. Yeo, *ACS Catal.*, 2015, **5**, 2814-2821.
- 7 O. A. Baturina, Q. Lu, M. A. Padilla, L. Xin, W. Li, A. Serov, K. Artyushkova, P. Atanassov, F. Xu, A. Epshteyn, T. Brintlinger, M. Schuette and G. E. Collins, *ACS Catal.*, 2014, **4**, 3682-3695.
- 8 A. Loiudice, P. Lobaccaro, E. A. Kamali, T. Thao, B. H. Huang, J. W. Ager and R. Buonsanti, *Angew. Chem. Int. Ed.*, 2016, **55**, 5789-5792.
- 9 D. Gao, I. Sinev, F. Scholten, R. M. Arán-Ais, N. J. Divins, K. Kvashnina, J. Timoshenko and B. Roldan Cuenya, *Angew. Chem. Int. Ed.*, 2019, **58**, 17047-17053.
- 10 Y. Zhou, F. Che, M. Liu, C. Zou, Z. Liang, P. De Luna, H. Yuan, J. Li, Z. Wang, H. Xie, H. Li, P. Chen, E. Bladt, R. Quintero-Bermudez, T.-K. Sham, S. Bals, J. Hofkens, D. Sinton, G. Chen and E. H. Sargent, *Nat. Chem.*, 2018, **10**, 974-980.
- 11 M. G. Kibria, C.-T. Dinh, A. Seifitokaldani, P. De Luna, T. Burdyny, R. Quintero-Bermudez, M. B. Ross, O. S. Bushuyev, F. P. García de Arquer, P. Yang, D. Sinton and E. H. Sargent, *Adv. Mater.*, 2018, **30**, 1804867.
- 12 H. Jung, S. Y. Lee, C. W. Lee, M. K. Cho, D. H. Won, C. Kim, H.-S. Oh, B. K. Min and Y. J. Hwang, *J. Am. Chem. Soc.*, 2019, **141**, 4624-4633.
- 13 H. Mistry, A. S. Varela, C. S. Bonifacio, I. Zegkinoglou, I. Sinev, Y.-W. Choi, K. Kisslinger, E. A. Stach, J. C. Yang, P. Strasser and B. R. Cuenya, *Nat. Commun.*, 2016, **7**, 12123.
- 14 J. Kim, W. Choi, J. W. Park, C. Kim, M. Kim and H. Song, *J. Am. Chem. Soc.*, 2019, **141**, 6986-6994.
- 15 C. Choi, S. Kwon, T. Cheng, M. Xu, P. Tieu, C. Lee, J. Cai, H. M. Lee, X. Pan, X. Duan, W. A. Goddard and Y. Huang, *Nat. Catal.*, 2020, **3**, 804-812.
